# Supplementary material for: A new method for amino acid geochronology of the bivalve shell Arctica islandica
Source: Copernicus journal article supplement (doi:10.5194/egusphere-2023-2560), 2023-11-15
Supplement: Supplementary file 1 [file egusphere-2023-2560-supplement.zip]

Fig. S1

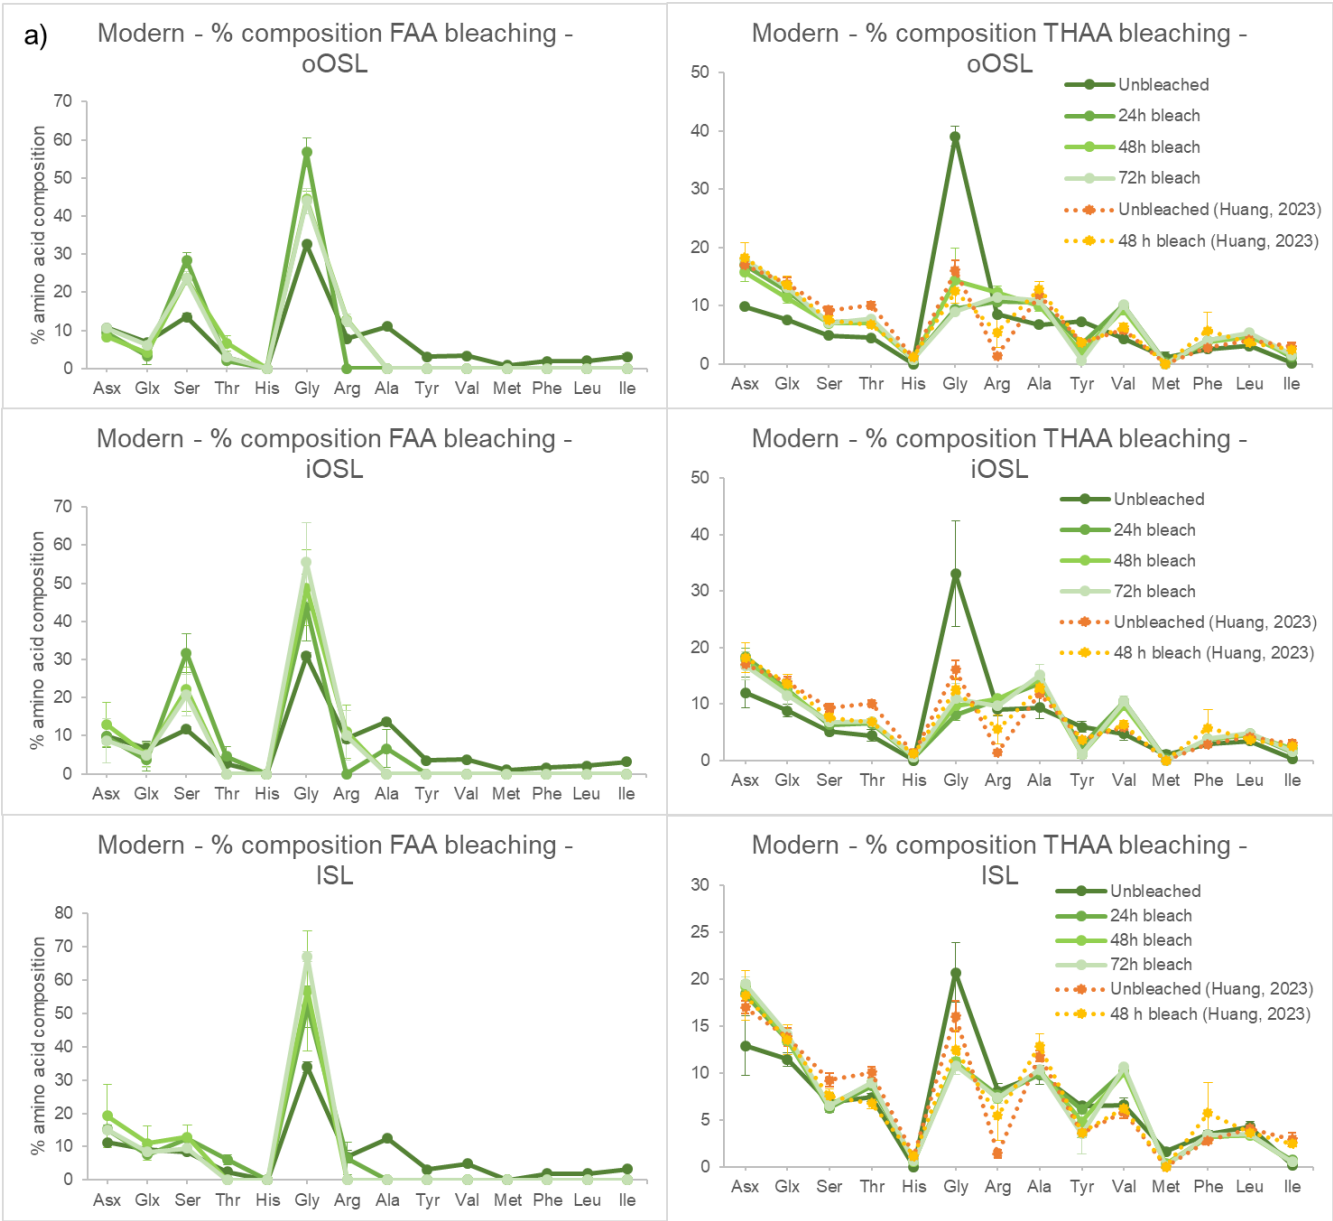

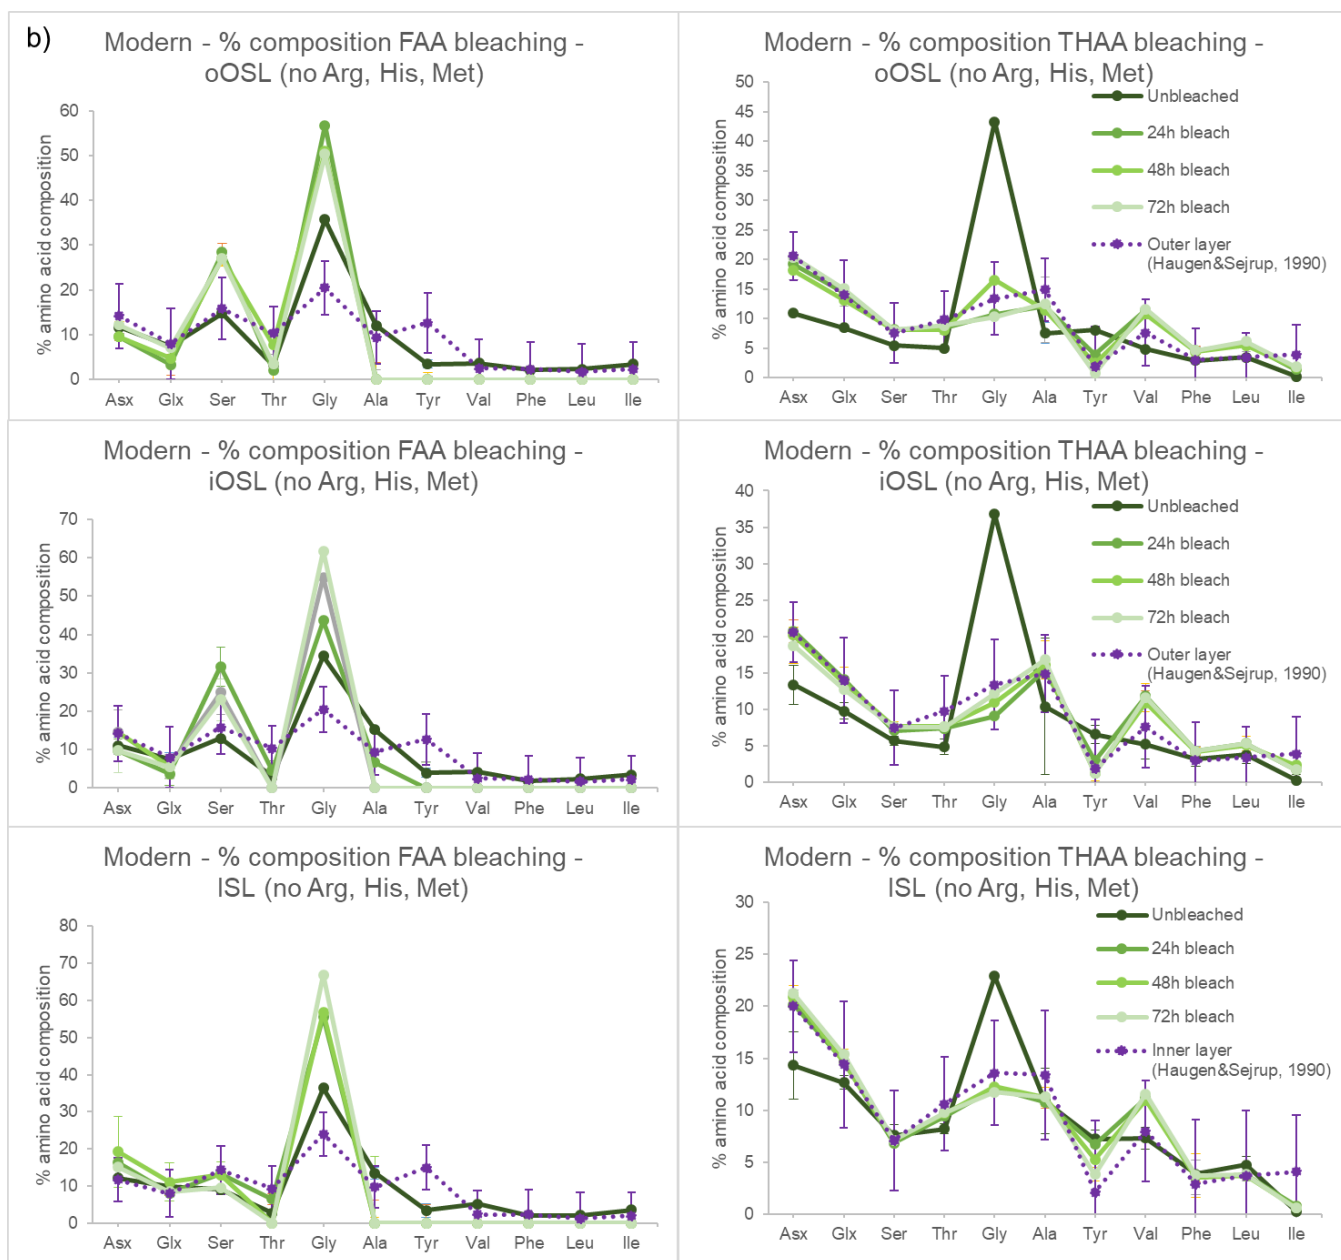

Fig. S1. (a) Amino acid composition of the three layers of modern *A. islandica* from Peterhead unbleached and with 24-72 h bleaching. Error bars indicate one standard deviation based on three replicates. (b) Percentage composition of the unbleached outer and inner layers of *A. islandica* from Haugen and Sejrup (1990) also plotted (purple dashed line) over the amino acid composition of modern bleaching experiments from this study.
