# Supplementary material for: A new method for amino acid geochronology of the bivalve shell Arctica islandica
Source: Copernicus journal article supplement (doi:10.5194/egusphere-2023-2560), 2023-11-15
Supplement: Supplementary file 2 [file egusphere-2023-2560-supplement.zip]

Fig. S2

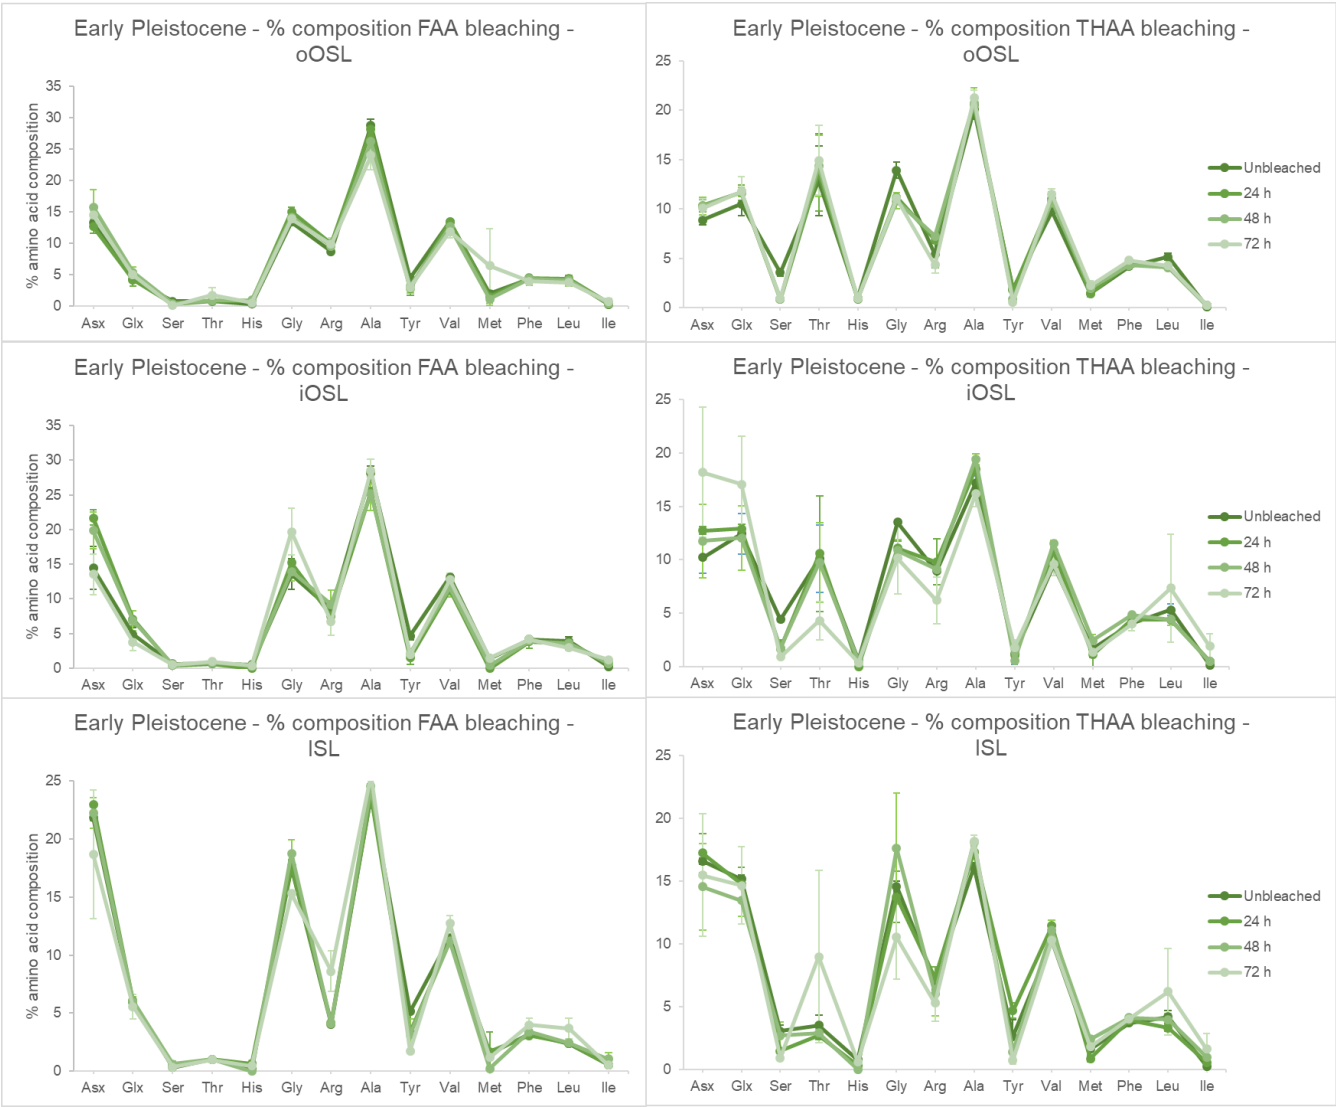

Fig. S2. Amino acid composition changes with bleaching of the three layers of Early Pleistocene *A. islandica* from Weybourne Crag. Error bars indicate one standard deviation based on two replicates.
