# Supplementary material for: A new method for amino acid geochronology of the bivalve shell Arctica islandica
Source: Copernicus journal article supplement (doi:10.5194/egusphere-2023-2560), 2023-11-15
Supplement: Supplementary file 3 [file egusphere-2023-2560-supplement.zip]

Fig. S6

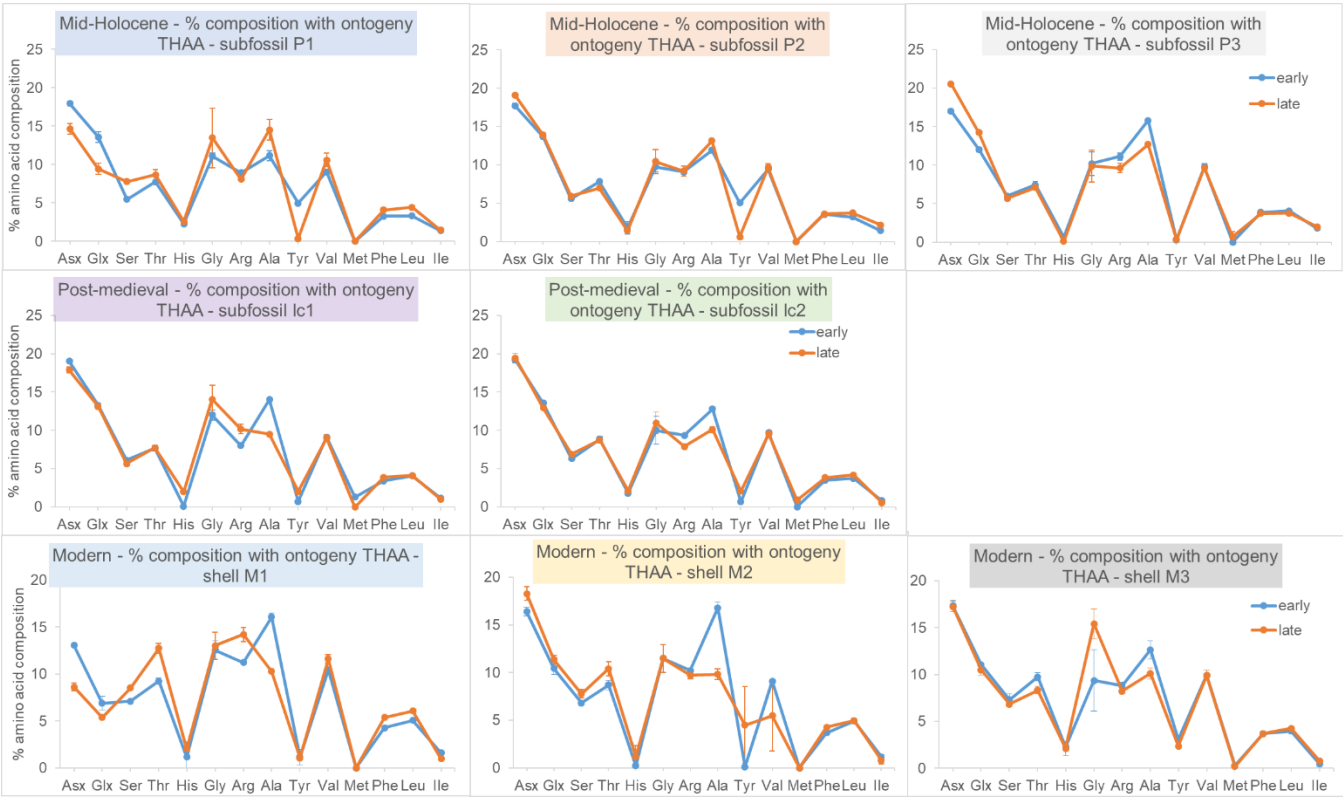

Fig. S6. Percentage composition of amino acids in three North Sea Mid-Holocene shells (top row), Icelandic post-medieval shells (middle row) and modern North Sea shells (bottom row). Error bars indicate one standard deviation based on two analytical replicates.
