# Supplementary material for: A new method for amino acid geochronology of the bivalve shell Arctica islandica
Source: Copernicus journal article supplement (doi:10.5194/egusphere-2023-2560), 2023-11-15
Supplement: Supplementary file 4 [file egusphere-2023-2560-supplement.zip]

Archive with 9 entries (9 files):
- Table S2.xlsx
- Fig. S1.pdf
- Fig. S2.pdf
- Fig. S3.pdf
- Fig. S4.pdf
- Fig. S5.pdf
- Fig. S6.pdf
- Fig. S7.pdf
- Table S1.pdf
