# Supplementary material for: A new method for amino acid geochronology of the bivalve shell Arctica islandica
Source: Copernicus journal article supplement (doi:10.5194/egusphere-2023-2560), 2023-11-15
Supplement: Supplementary file 4 [file egusphere-2023-2560-supplement.zip › Fig. S3.pdf]

Fig. S3

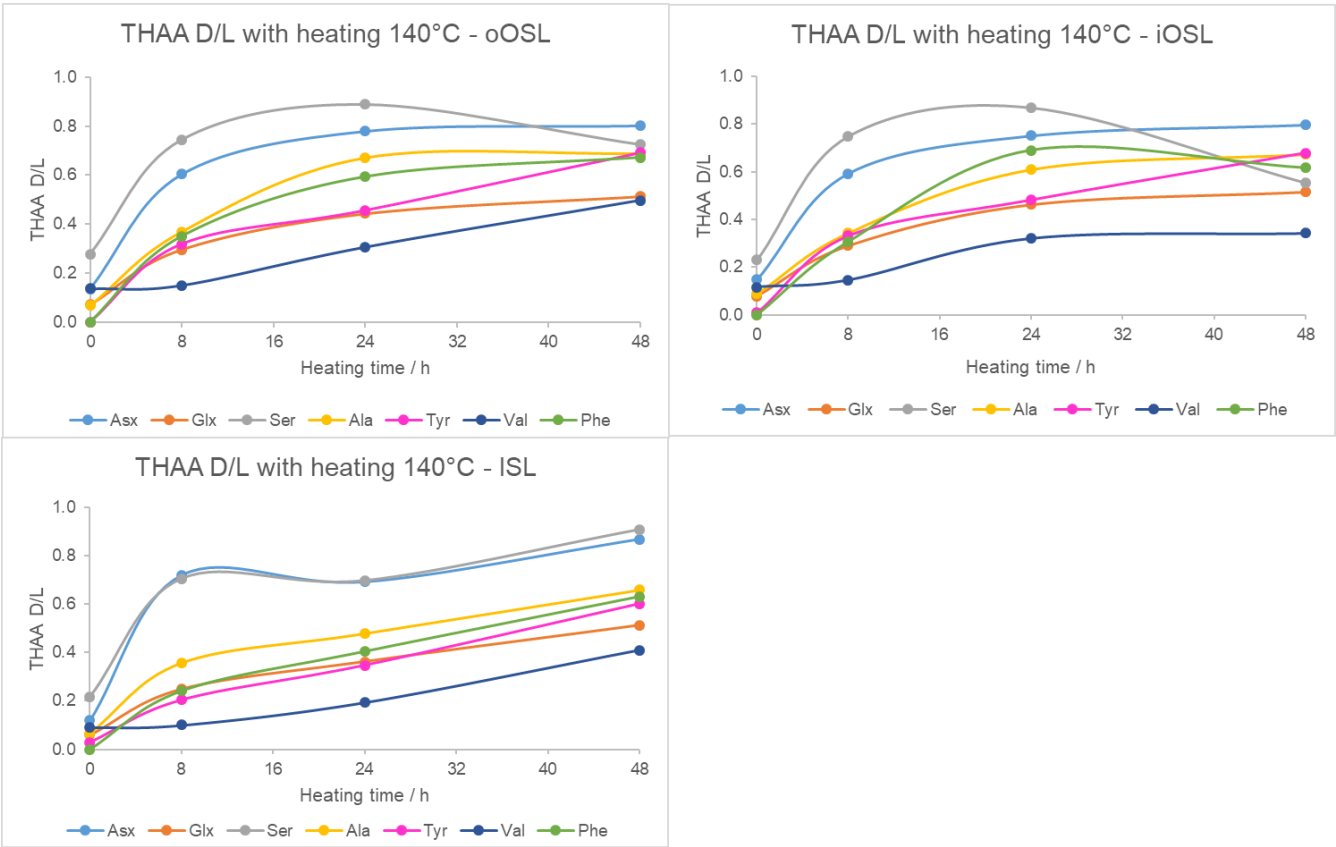

Fig. S3. THAA D/L values of the three layers of modern *A. islandica* from Peterhead unheated and heating 8-48 h at 140°C.
