# Supplementary material for: A new method for amino acid geochronology of the bivalve shell Arctica islandica
Source: Copernicus journal article supplement (doi:10.5194/egusphere-2023-2560), 2023-11-15
Supplement: Supplementary file 4 [file egusphere-2023-2560-supplement.zip › Fig. S4.pdf]

Fig. S4

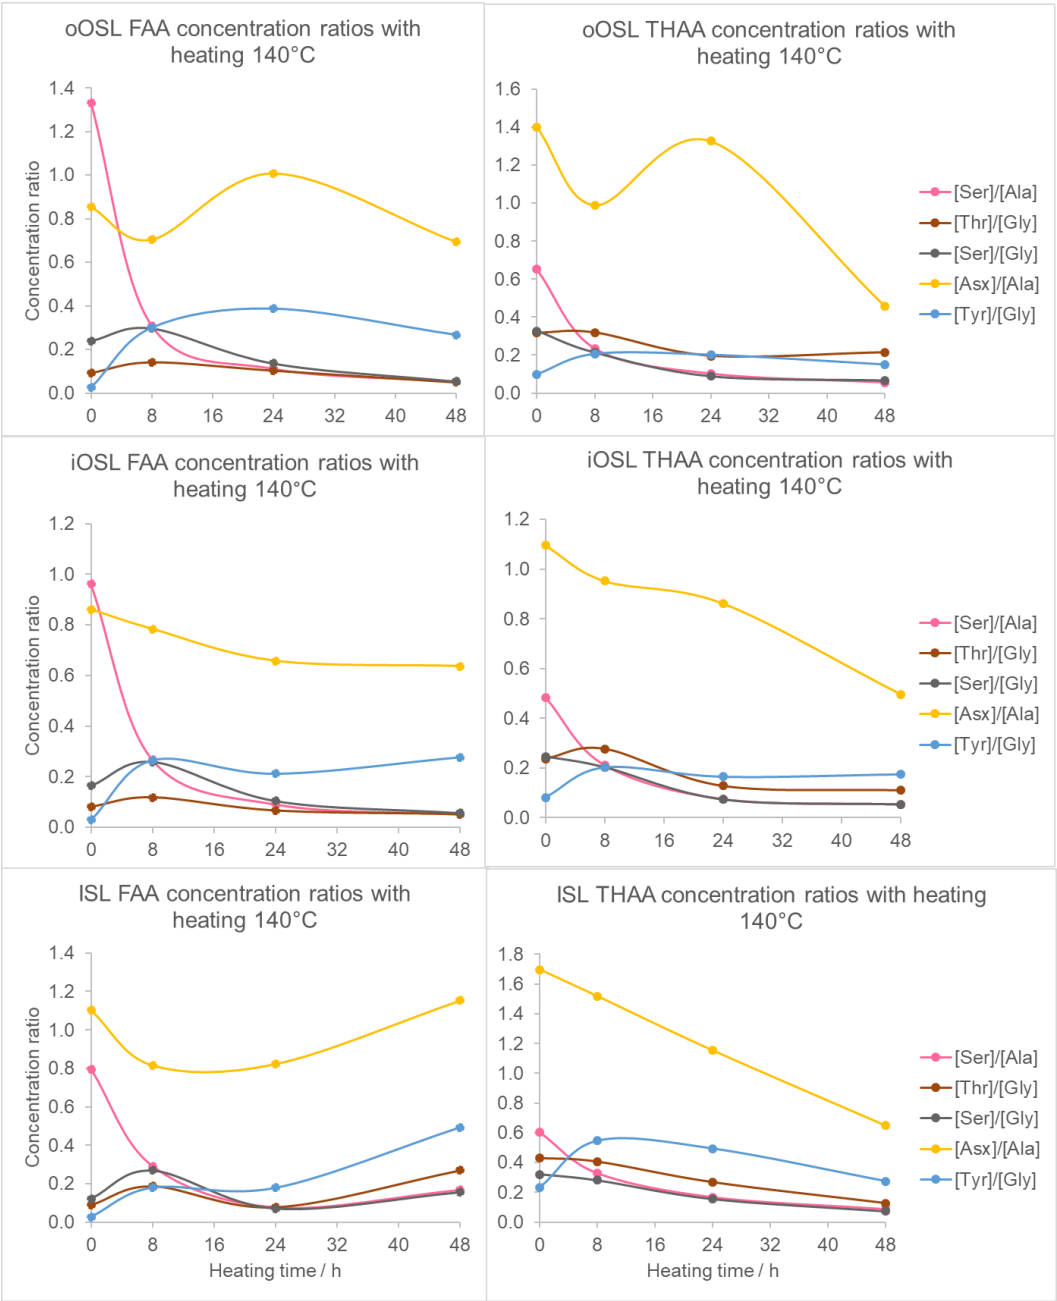

Fig. S4. [Ser]/[Ala], [Asx]/[Ala], [Thr]/[Gly], [Ser]/[Gly], [Tyr]/[Gly], in the oOSL, iOSL and ISL layers of modern *A. islandica* from Peterhead following heating at 140°C for 8-48 h.
