# Supplementary material for: A new method for amino acid geochronology of the bivalve shell Arctica islandica
Source: Copernicus journal article supplement (doi:10.5194/egusphere-2023-2560), 2023-11-15
Supplement: Supplementary file 4 [file egusphere-2023-2560-supplement.zip › Fig. S5.pdf]

**Fig. S5**

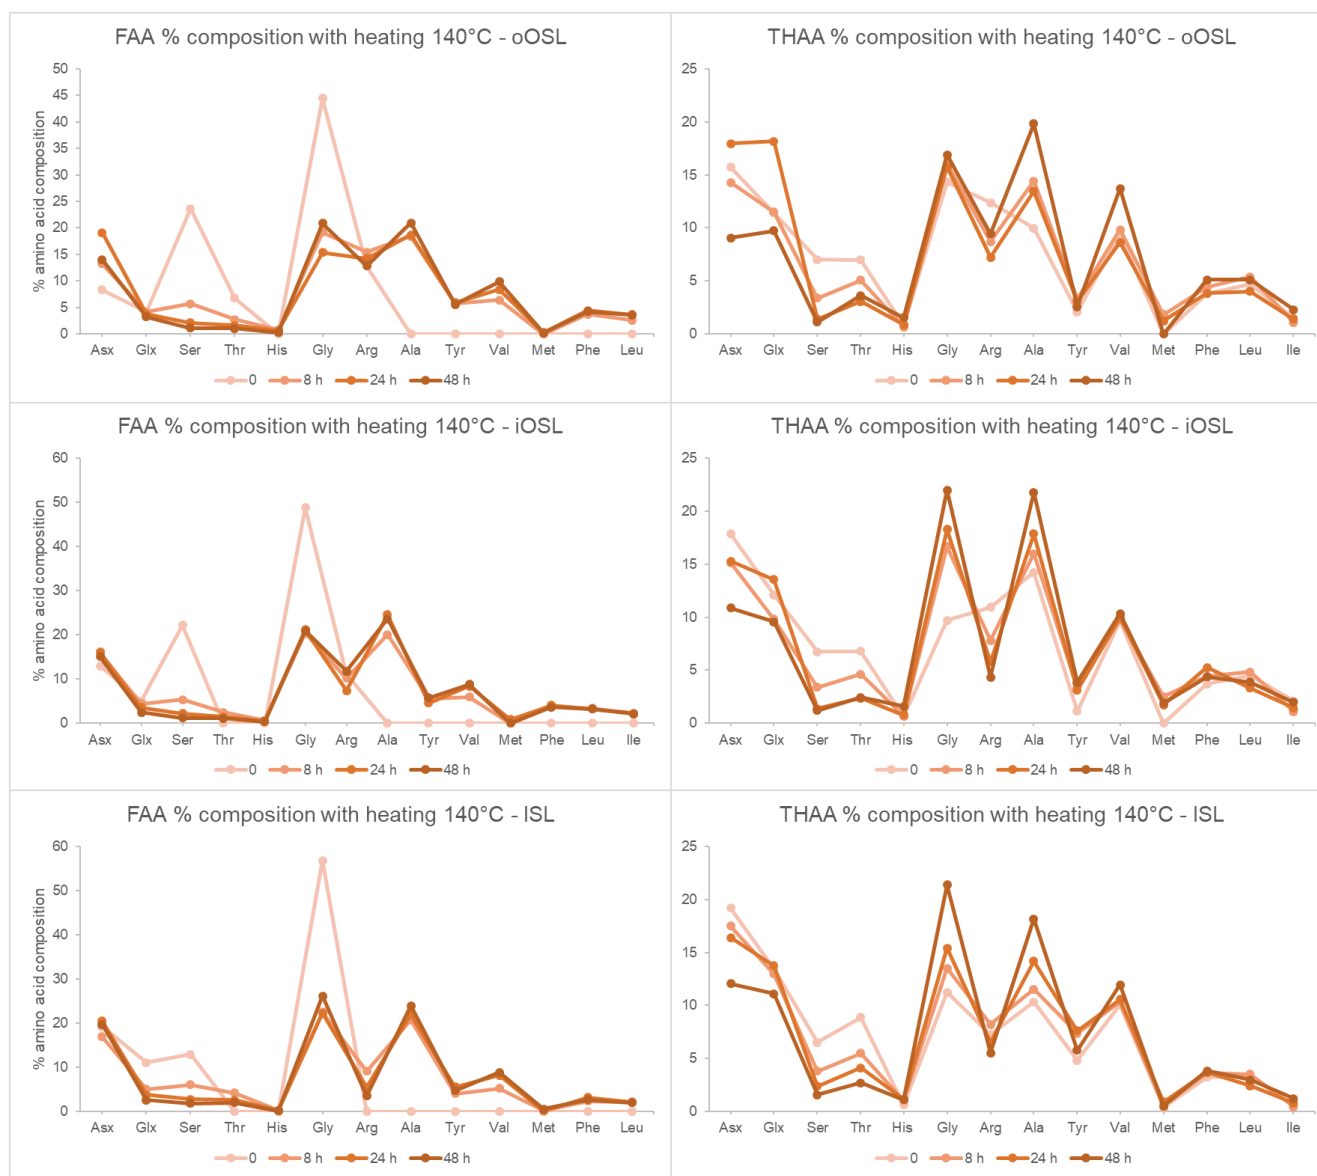

Fig. S5. Percentage composition of FAA and THAA amino acids in each microstructural layer in modern *A. islandica* from Peterhead heated at 140°C.
