# Supplementary material for: A new method for amino acid geochronology of the bivalve shell Arctica islandica
Source: Copernicus journal article supplement (doi:10.5194/egusphere-2023-2560), 2023-11-15
Supplement: Supplementary file 4 [file egusphere-2023-2560-supplement.zip › Fig. S7.pdf]

**Fig. S7**

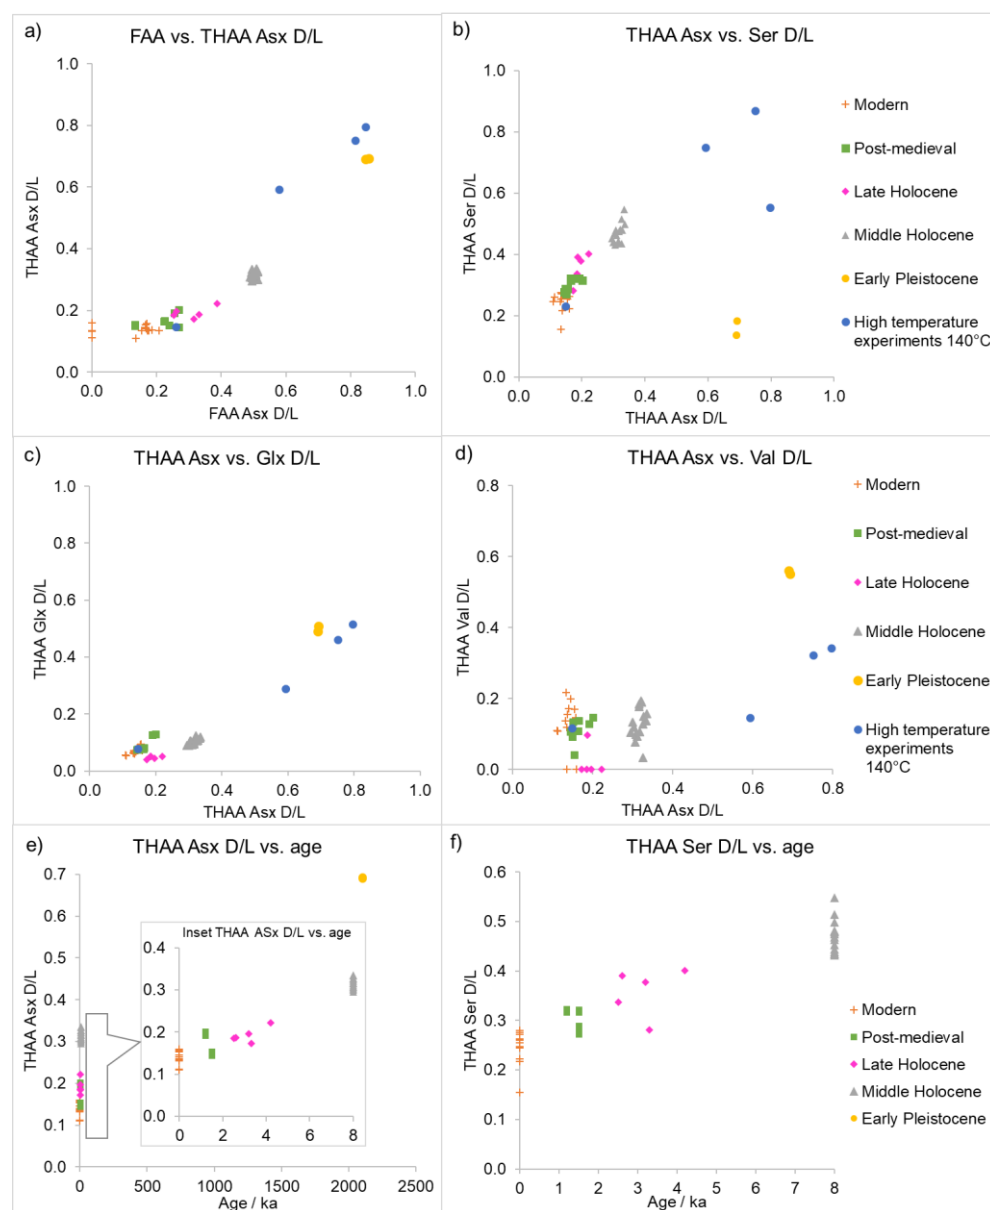

Fig. S7. a) FAA vs. THAA Asx D/L; b) THAA Asx vs. Ser D/L; c) THAA Asx vs. Glx D/L; d) THAA Asx vs. Val D/L; e) THAA Asx D/L vs. age and inset focusing on the last 8 ka; f) THAA Ser D/L vs. age of modern, post-medieval, Late Holocene, Middle Holocene and Early Pleistocene *A. islandica* shells. The D/L of the high temperature experiments at 140°C are also overlaid
