# Supplementary material for: A new method for amino acid geochronology of the bivalve shell Arctica islandica
Source: Copernicus journal article supplement (doi:10.5194/egusphere-2023-2560), 2023-11-15
Supplement: Supplementary file 4 [file egusphere-2023-2560-supplement.zip › Table S1.pdf]

**Table S1**

Table S1. Radiocarbon dating results and calibration carried out using Calib 8.2 (Stuiver and Reimer, 1993) and Marine20 calibration curve (Heaton et al., 2020) and using a regional value for the marine reservoir correction ( $\Delta R$ ) of  $= -40 \pm 20$  years (14CHRONO Marine Reservoir Database; [www.calib.org](http://www.calib.org)), estimated based on measurements in *A. islandica* shells from Grimsey (Scourse et al., 2012).

| Laboratory ID | Shell ID | Sample details                    | <sup>14</sup> C AMS age ( $\pm 1\sigma$ yr BP) | 2 $\sigma$ calibrated age range (cal yr BP) calibrated using Marine20 |
|---------------|----------|-----------------------------------|------------------------------------------------|-----------------------------------------------------------------------|
| 11531         | 061617   | W. Grimsey, Depth: 80-85 m (bl s) | 2841 $\pm$ 33                                  | 2313-2665                                                             |
| 11539         | 061711   | W. Grimsey, Depth: 80-85 m (bl s) | 2938 $\pm$ 33                                  | 2403-2736                                                             |
| 11525         | 061407   | W. Grimsey, Depth: 80-85 m (bl s) | 3411 $\pm$ 37                                  | 2977-3331                                                             |
| 11540         | 061746   | W. Grimsey, Depth: 80-85 m (bl s) | 3535 $\pm$ 36                                  | 3134-3460                                                             |
| 11517         | 061305   | W. Grimsey, Depth: 80-85 m (bl s) | 4222 $\pm$ 40                                  | 3984-4380                                                             |
