# Supplementary material for: A new method for amino acid geochronology of the bivalve shell Arctica islandica
Source: Copernicus journal article supplement (doi:10.5194/egusphere-2023-2560), 2023-11-15
Supplement: Supplementary file 4 [file egusphere-2023-2560-supplement.zip › Table S2.xlsx]

## Sheet: Read Me
Arctica islandica - Amino Acid Racemisation Data
-----------------------------------------------------------------------
World Data Center for Paleoclimatology, Boulder
and
NOAA Paleoclimatology Program
-----------------------------------------------------------------------
NOTE: PLEASE CITE ORIGINAL REFERENCE WHEN USING THIS DATA!!!!!
NAME OF DATA SET:	Arctica islandica - Amino Acid Racemisation Data
LAST UPDATE:	2023-10-01
CONTRIBUTORS:	Conti, M.L.G.; Butler, P.B; Reynolds, D.J.; Trofimova, T.; Scourse, J.D.; Penkman, K.E.H.
IGBP PAGES/WDCA CONTRIBUTION SERIES NUMBER:
WDC PALEO CONTRIBUTION SERIES CITATION:
ORIGINAL REFERENCE:
ABSTRACT:
GEOGRAPHIC REGION:	Fladen Ground, North Sea, North Icelandic Shelf
PERIOD OF RECORD:	~2.1 Ma - present
FUNDING SOURCES:	European Research Council (grant agreement No. 856488)
DESCRIPTION:
Lab	Reverse-phase at NEaar (University of York)
Lab PI	Penkman, K.E.H. (NEaar)
Preparation date	2022-2023
Pretreatment	repeated sonication in MilliQ H2O; samples drilled, bleached with 12% NaOCl
Hydrolysis procedure	24 hr at 110°C in 20 µL/mg of 7 M HCl under N2
Bleach	Yes
Analytical method	RP-UHPLC
Instrumental programming
Concentration is based on internal calibration with L-hArg (RP-HPLC)
Area or height ratio	Area
Blank corrections	none
Response factors	lab standard

## Sheet: Range-finding data
Extent of amino acid racemization (D/L) for free amino acid (FAA) Asx and total hydrolisable amino acid (THAA) fraction Asx and Ser for A. islandica from the North Sea and Iceland
(samples with the same Lab ID are analytical replicates)
All concentrations are reported in pmol/mg.
Shell ID	Sample name (Ar…)	Lab ID	Area	Country	Latitude	Longitude	Layer	Bleach time / h	FAA Asx D/L	THAA Asx D/L	THAA Ser D/L	Age assignment	Criteria
FG22102560	FG22102560	15994	Fladen Ground	UK	59.383	0.5	iOSL	48	0	0.128663	0.255585	Modern	3/3 agreement
FG22102561	FG22102561	16003	Fladen Ground	UK	59.383	0.5	iOSL	48	0	0.134095	0.237987	Modern	3/3 agreement
FG22102586	FG22102586	16001	Fladen Ground	UK	59.383	0.5	iOSL	48	0.191619	0.173515	0.293152	Post-medieval	3/3 agreement
FG22202524	FG22202524	15992	Fladen Ground	UK	59.383	0.5	iOSL	48	0	0.168472	0.316524	Post-medieval	2/3 agreement
FG22202527	FG22202527	15998	Fladen Ground	UK	59.383	0.5	iOSL	48	0.21024	0.191257	0.337574	Late Holocene	2/3 agreement
FG22202529	FG22202529	15991	Fladen Ground	UK	59.383	0.5	iOSL	48	0	0.134452	0.235782	Modern	3/3 agreement
FG22202530	FG22202530	15993	Fladen Ground	UK	59.383	0.5	iOSL	48	0.191133	0.173752	0.339573	Late Holocene	2/3 agreement
FG22202551	FG22202551	15997	Fladen Ground	UK	59.383	0.5	iOSL	48	0	0.135081	0.250402	Modern	3/3 agreement
FG22202570	FG22202570	15990	Fladen Ground	UK	59.383	0.5	iOSL	48	0	0.133382	0.249014	Modern	3/3 agreement
FG22202571	FG22202571	16004	Fladen Ground	UK	59.383	0.5	iOSL	48	0.20068	0.180318	0.344704	Late Holocene	2/3 agreement
FG22202587	FG22202587	16002	Fladen Ground	UK	59.383	0.5	iOSL	48	0.200425	0.17575	0.34197	Late Holocene / Post-medieval	Overlap
FG22202591	FG22202591	15995	Fladen Ground	UK	59.383	0.5	iOSL	48	0.0548267	0.1374	0.280985	Modern	3/3 agreement
FG22202597	FG22202597	15996	Fladen Ground	UK	59.383	0.5	iOSL	48	0	0.130799	0.248404	Modern	3/3 agreement
FG22202598	FG22202598	15999	Fladen Ground	UK	59.383	0.5	iOSL	48	0.193613	0.175366	0.32994	Post-medieval	3/3 agreement
FG22203259	FG22203259	16000	Fladen Ground	UK	59.383	0.5	iOSL	48	0.186677	0.162803	0.293749	Post-medieval	3/3 agreement
22200120	Ic22200120	16014	Grimsey Island	Iceland	66.527	-18.2	iOSL	48	0	0.111778	0.27162	Modern	3/3 agreement
22200123	Ic22200123	16015	Grimsey Island	Iceland	66.527	-18.2	iOSL	48	0	0.153915	0.295327	Post-medieval/ modern	Overlap
22200189	Ic22200189	16013	Grimsey Island	Iceland	66.527	-18.2	iOSL	48	0	0.143336	0.306259	Post-medieval/ modern	Overlap
22200191	Ic22200191	16009	Grimsey Island	Iceland	66.527	-18.2	iOSL	48	0.300642	0.20916	0.399226	Late Holocene	3/3 agreement
22200193	Ic22200193	16016	Grimsey Island	Iceland	66.527	-18.2	iOSL	48	0.263461	0.202845	0.378142	Late Holocene	2/3 agreement
22200198	Ic22200198	16017	Grimsey Island	Iceland	66.527	-18.2	iOSL	48	0	0.141229	0.278983	Post-medieval	3/3 agreement
22200199	Ic22200199	16006	Grimsey Island	Iceland	66.527	-18.2	iOSL	48	0.319454	0.218649	0.404699	Late Holocene	3/3 agreement
22200210	Ic22200210	16018	Grimsey Island	Iceland	66.527	-18.2	iOSL	48	0	0.138894	0.259561	Post-medieval	2/3 agreement
22200226	Ic22200226	16019	Grimsey Island	Iceland	66.527	-18.2	iOSL	48	0.22301	0.185927	0.358819	Late Holocene	2/3 agreement
22200228	Ic22200228	16005	Grimsey Island	Iceland	66.527	-18.2	iOSL	48	0.138824	0.155001	0.289807	Post-medieval	3/3 agreement
22200233	Ic22200233	16008	Grimsey Island	Iceland	66.527	-18.2	iOSL	48	0.295688	0.211896	0.3161	Late Holocene	3/3 agreement
22201253	Ic22201253	16011	Grimsey Island	Iceland	66.527	-18.2	iOSL	48	0	0.14908	0.280464	Post-medieval/ modern	Overlap
22201254	Ic22201254	16012	Grimsey Island	Iceland	66.527	-18.2	iOSL	48	0	0.140266	0.272653	Modern	2/3 agreement
22201264	Ic22201264	16007	Grimsey Island	Iceland	66.527	-18.2	iOSL	48	0	0.130968	0.281278	Modern	3/3 agreement
22201280	Ic22201280	16010	Grimsey Island	Iceland	66.527	-18.2	iOSL	48	0	0.135336	0.260681	Modern	3/3 agreement
22102569	FG22102569	16124	Fladen Ground	UK	59.383	0.5	iOSL	48	0	0.102557	0.245849	Modern	3/3 agreement
22202543	FG22202543	16125	Fladen Ground	UK	59.383	0.5	iOSL	48	0	0.107127	0.272221	Modern	3/3 agreement
22202544	FG22202544	16126	Fladen Ground	UK	59.383	0.5	iOSL	48	0	0.102371	0.254563	Modern	3/3 agreement
22202572	FG22202572	16127	Fladen Ground	UK	59.383	0.5	iOSL	48	0	0.0890178	0.134593	Modern	3/3 agreement
22202573	FG22202573	16128	Fladen Ground	UK	59.383	0.5	iOSL	48	0	0.100241	0.248323	Modern	3/3 agreement
22202574	FG22202574	16129	Fladen Ground	UK	59.383	0.5	iOSL	48	0	0.0847558	0.254627	Modern	3/3 agreement
22202575	FG22202575	16130	Fladen Ground	UK	59.383	0.5	iOSL	48	0	0.102624	0.226204	Modern	3/3 agreement
22202576	FG22202576	16131	Fladen Ground	UK	59.383	0.5	iOSL	48	0	0.0977314	0.227389	Modern	3/3 agreement
22202577	FG22202577	16132	Fladen Ground	UK	59.383	0.5	iOSL	48	0	0.102288	0.251918	Modern	3/3 agreement
22202578	FG22202578	16133	Fladen Ground	UK	59.383	0.5	iOSL	48	0	0.101677	0.235229	Modern	3/3 agreement
22202579	FG22202579	16134	Fladen Ground	UK	59.383	0.5	iOSL	48	0	0.10047	0.240864	Modern	3/3 agreement
22202580	FG22202580	16135	Fladen Ground	UK	59.383	0.5	iOSL	48	0	0.104589	0.245098	Modern	3/3 agreement
22202588	FG22202588	16136	Fladen Ground	UK	59.383	0.5	iOSL	48	0	0.0984028	0.268471	Modern	3/3 agreement
22202589	FG22202589	16137	Fladen Ground	UK	59.383	0.5	iOSL	48	0	0.0923793	0.243838	Modern	3/3 agreement
22202590	FG22202590	16138	Fladen Ground	UK	59.383	0.5	iOSL	48	0	0.100732	0.265423	Modern	3/3 agreement
22202592	FG22202592	16139	Fladen Ground	UK	59.383	0.5	iOSL	48	0	0.101228	0.256565	Modern	3/3 agreement
22202558	FG22202558	16140	Fladen Ground	UK	59.383	0.5	iOSL	48	0	0.107503	0.264759	Modern	3/3 agreement
22202595	FG22202595	16141	Fladen Ground	UK	59.383	0.5	iOSL	48	0	0.101081	0.230887	Modern	3/3 agreement
22202593	FG22202593	16142	Fladen Ground	UK	59.383	0.5	iOSL	48	0	0.104488	0.248119	Modern	3/3 agreement
22202594	FG22202594	16143	Fladen Ground	UK	59.383	0.5	iOSL	48	0	0.104743	0.231971	Modern	3/3 agreement
22202596	FG22202596	16144	Fladen Ground	UK	59.383	0.5	iOSL	48	0.189919	0.139948	0.347746	Post-medieval	2/3 agreement
22202552	FG22202552	16145	Fladen Ground	UK	59.383	0.5	iOSL	48	0	0.0940846	0.213368	Modern	3/3 agreement
22202553	FG22202553	16146	Fladen Ground	UK	59.383	0.5	iOSL	48	0	0.100328	0.243442	Modern	3/3 agreement
22202541	FG22202541	16147	Fladen Ground	UK	59.383	0.5	iOSL	48	0	0.0918383	0.238499	Modern	3/3 agreement
22202540	FG22202540	16148	Fladen Ground	UK	59.383	0.5	iOSL	48	0	0.0978248	0.222538	Modern	3/3 agreement
22202539	FG22202539	16149	Fladen Ground	UK	59.383	0.5	iOSL	48	0	0.101675	0.244292	Modern	3/3 agreement
22202564	FG22202564	16150	Fladen Ground	UK	59.383	0.5	iOSL	48	0	0.100662	0.25219	Modern	3/3 agreement
22202565	FG22202565	16151	Fladen Ground	UK	59.383	0.5	iOSL	48	0	0.0997825	0.240129	Modern	3/3 agreement
22202566	FG22202566	16152	Fladen Ground	UK	59.383	0.5	iOSL	48	0	0.0974932	0.235389	Modern	3/3 agreement
22202562	FG22202562	16153	Fladen Ground	UK	59.383	0.5	iOSL	48	0	0.0958406	0.25016	Modern	3/3 agreement
22202563	FG22202563	16154	Fladen Ground	UK	59.383	0.5	iOSL	48	0	0.0976166	0.239902	Modern	3/3 agreement
22202523	FG22202523	16155	Fladen Ground	UK	59.383	0.5	iOSL	48	0.168255	0.119296	0.296272	Post-medieval/ modern	Overlap
22202525	FG22202525	16156	Fladen Ground	UK	59.383	0.5	iOSL	48	0	0.100235	0.245227	Modern	3/3 agreement
22202526	FG22202526	16157	Fladen Ground	UK	59.383	0.5	iOSL	48	0	0.0941296	0.225	Modern	3/3 agreement
22202528	FG22202528	16158	Fladen Ground	UK	59.383	0.5	iOSL	48	0.208028	0.150075	0.327243	Post-medieval	3/3 agreement
22202542	FG22202542	16159	Fladen Ground	UK	59.383	0.5	iOSL	48	0	0.104579	0.268448	Modern	3/3 agreement
22202545	FG22202545	16160	Fladen Ground	UK	59.383	0.5	iOSL	48	0	0.0719369	0.0520115	Modern	3/3 agreement
NIS22200033	Ic22200033	16161	Grimsey Island	Iceland	66.527	-18.2	iOSL	48	0.156494	0.107759	0.328081	Post-medieval/ modern	Overlap
NIS22200037	Ic22200037	16162	Grimsey Island	Iceland	66.527	-18.2	iOSL	48	0.294936	0.178171	0.406401	Late Holocene	3/3 agreement
NIS22200041	Ic22200041	16163	Grimsey Island	Iceland	66.527	-18.2	iOSL	48	0.27019	0.156103	0.364744	Late Holocene	2/3 agreement
NIS22200046	Ic22200046	16164	Grimsey Island	Iceland	66.527	-18.2	iOSL	48	0.151539	0.107413	0.304133	Post-medieval	2/3 agreement
NIS22200057	Ic22200057	16165	Grimsey Island	Iceland	66.527	-18.2	iOSL	48	0	0.0827809	0.243671	Modern	3/3 agreement
NIS22200066	Ic22200066	16166	Grimsey Island	Iceland	66.527	-18.2	iOSL	48	0	0.0807436	0.249871	Modern	3/3 agreement
NIS22200188	Ic22200188	16167	Grimsey Island	Iceland	66.527	-18.2	iOSL	48	0	0.0895132	0.262547	Modern	3/3 agreement
NIS22200201	Ic22200201	16168	Grimsey Island	Iceland	66.527	-18.2	iOSL	48	0.275702	0.161722	0.386688	Late Holocene	2/3 agreement
NIS22200205	Ic22200205	16169	Grimsey Island	Iceland	66.527	-18.2	iOSL	48	0	0.103852	0.295618	Modern	2/3 agreement
NIS22200216	Ic22200216	16170	Grimsey Island	Iceland	66.527	-18.2	iOSL	48	0	0.0814535	0.253332	Modern	3/3 agreement
NIS22200225	Ic22200225	16171	Grimsey Island	Iceland	66.527	-18.2	iOSL	48	0	0.0882934	0.266437	Modern	3/3 agreement
NIS22200272	Ic22200272	16172	Grimsey Island	Iceland	66.527	-18.2	iOSL	48	0	0.0693399	0.19733	Modern	3/3 agreement
NIS22200284	Ic22200284	16173	Grimsey Island	Iceland	66.527	-18.2	iOSL	48	0	0.0821744	0.252241	Modern	3/3 agreement
NIS22200287	Ic22200287	16174	Grimsey Island	Iceland	66.527	-18.2	iOSL	48	0	0.107574	0.306919	Modern	2/3 agreement
NIS22200293	Ic22200293	16175	Grimsey Island	Iceland	66.527	-18.2	iOSL	48	0	0.0871302	0.276372	Modern	3/3 agreement
NIS22200295	Ic22200295	16176	Grimsey Island	Iceland	66.527	-18.2	iOSL	48	0.269676	0.161873	0.383547	Late Holocene	2/3 agreement
NIS22201162	Ic22201162	16177	Grimsey Island	Iceland	66.527	-18.2	iOSL	48	0	0.0934182	0.304501	Modern	2/3 agreement
NIS22201166	Ic22201166	16178	Grimsey Island	Iceland	66.527	-18.2	iOSL	48	0	0.079539	0.252299	Modern	3/3 agreement
NIS22201173	Ic22201173	16179	Grimsey Island	Iceland	66.527	-18.2	iOSL	48	0	0.0832001	0.260004	Modern	3/3 agreement
NIS22201210	Ic22201210	16180	Grimsey Island	Iceland	66.527	-18.2	iOSL	48	0.285281	0.162926	0.405412	Late Holocene	2/3 agreement
NIS22201212	Ic22201212	16181	Grimsey Island	Iceland	66.527	-18.2	iOSL	48	0	0.0820525	0.250992	Modern	3/3 agreement
NIS22201259	Ic22201259	16182	Grimsey Island	Iceland	66.527	-18.2	iOSL	48	0.293986	0.170314	0.408695	Late Holocene	3/3 agreement
NIS22201260	Ic22201260	16183	Grimsey Island	Iceland	66.527	-18.2	iOSL	48	0.282675	0.164707	0.388021	Late Holocene	2/3 agreement
NIS22201277	Ic22201277	16184	Grimsey Island	Iceland	66.527	-18.2	iOSL	48	0.309465	0.184578	0.406579	Late Holocene	3/3 agreement
NIS22202034	Ic22202034	16185	Grimsey Island	Iceland	66.527	-18.2	iOSL	48	0.342943	0.194512	0.416482	Late Holocene	3/3 agreement
NIS22202043	Ic22202043	16186	Grimsey Island	Iceland	66.527	-18.2	iOSL	48	0.178248	0.100466	0.304081	Post-medieval	2/3 agreement
NIS22202050	Ic22202050	16187	Grimsey Island	Iceland	66.527	-18.2	iOSL	48	0.346067	0.184427	0.43072	Late Holocene	3/3 agreement
NIS22202057	Ic22202057	16188	Grimsey Island	Iceland	66.527	-18.2	iOSL	48	0	0.0893257	0.273594	Modern	3/3 agreement
NIS22203436	Ic22203436	16189	Grimsey Island	Iceland	66.527	-18.2	iOSL	48	0	0.0893916	0.290824	Modern	2/3 agreement
NIS22201271	Ic22201271	16190	Grimsey Island	Iceland	66.527	-18.2	iOSL	48	0	0.0955646	0.303896	Modern	2/3 agreement
22201300	Ic22201300	16481	Grimsey Island	Iceland	66.5317	-18.2135	iOSL	48	0.323535	0.266644	0.409756	Mid-Late Holocene	2/3 agreement
22201200	Ic22201200	16482	Grimsey Island	Iceland	66.5317	-18.2135	iOSL	48	0.192956	0.21063	0.312834	Post-medieval	2/3 agreement
22201201	Ic22201201	16483	Grimsey Island	Iceland	66.5317	-18.2135	iOSL	48	0	0.171059	0.24773	Modern	2/3 agreement
22201202	Ic22201202	16484	Grimsey Island	Iceland	66.5317	-18.2135	iOSL	48	0	0.164695	0.245162	Modern	2/3 agreement
22201213	Ic22201213	16485	Grimsey Island	Iceland	66.5317	-18.2135	iOSL	48	0.163329	0.204061	0.319729	Post-medieval	2/3 agreement
22201227	Ic22201227	16486	Grimsey Island	Iceland	66.5317	-18.2135	iOSL	48	0	0.150869	0.273999	Modern	2/3 agreement
22201229	Ic22201229	16487	Grimsey Island	Iceland	66.5317	-18.2135	iOSL	48	0.111763	0.18452	0.311598	Post-medieval/ modern	Overlap
22201231	Ic22201231	16488	Grimsey Island	Iceland	66.5317	-18.2135	iOSL	48	0	0.166501	0.260709	Modern	2/3 agreement
22201237	Ic22201237	16489	Grimsey Island	Iceland	66.5317	-18.2135	iOSL	48	0	0.173764	0.262416	Modern	2/3 agreement
22201243	Ic22201243	16490	Grimsey Island	Iceland	66.5317	-18.2135	iOSL	48	0	0.171896	0.274914	Modern	2/3 agreement
22201251	Ic22201251	16491	Grimsey Island	Iceland	66.5317	-18.2135	iOSL	48	0	0.171128	0.252408	Modern	2/3 agreement
22201263	Ic22201263	16492	Grimsey Island	Iceland	66.5317	-18.2135	iOSL	48	0	0.171044	0.254502	Modern	2/3 agreement
22201281	Ic22201281	16493	Grimsey Island	Iceland	66.5317	-18.2135	iOSL	48	0	0.168826	0.260684	Modern	2/3 agreement
22201272	Ic22201272	16494	Grimsey Island	Iceland	66.5317	-18.2135	iOSL	48	0	0.172647	0.252544	Modern	2/3 agreement
22201276	Ic22201276	16495	Grimsey Island	Iceland	66.5317	-18.2135	iOSL	48	0	0.166008	0.253603	Modern	2/3 agreement
22200035	Ic22200035	16496	Grimsey Island	Iceland	66.5298	-18.2071	iOSL	48	0.354403	0.263645	0.418332	Mid-Late Holocene	3/3 agreement
22200194	Ic22200194	16497	Grimsey Island	Iceland	66.5258	-18.2002	iOSL	48	0.295073	0.232459	0.382428	Mid-Late Holocene	3/3 agreement
22202048	Ic22202048	16498	Grimsey Island	Iceland	66.5068	-18.1949	iOSL	48	0.269297	0.241482	0.394121	Mid-Late Holocene	3/3 agreement
22200204	Ic22200204	16499	Grimsey Island	Iceland	66.5258	-18.2002	iOSL	48	0	0.118099	0.257108	Modern	3/3 agreement
22202041	Ic22202041	16500	Grimsey Island	Iceland	66.5068	-18.1949	iOSL	48	0	0.151013	0.242985	Modern	2/3 agreement
22200232	Ic22200232	16501	Grimsey Island	Iceland	66.5258	-18.2002	iOSL	48	0	0.141108	0.265739	Modern	2/3 agreement
22202030	Ic22202030	16502	Grimsey Island	Iceland	66.5068	-18.1949	iOSL	48	0	0.133865	0.244319	Modern	3/3 agreement
22200213	Ic22200213	16503	Grimsey Island	Iceland	66.5258	-18.2002	iOSL	48	0	0.100172	0.226378	Modern	3/3 agreement
22200294	Ic22200294	16504	Grimsey Island	Iceland	66.5128	-18.198	iOSL	48	0	0.112359	0.301165	Modern	2/3 agreement
22201493	Ic22201493	16505	Grimsey Island	Iceland	66.4613	-18.2246	iOSL	48	0	0.151361	0.257602	Modern	2/3 agreement
22201494	Ic22201494	16506	Grimsey Island	Iceland	66.4613	-18.2246	iOSL	48	0	0.121644	0.253286	Modern	3/3 agreement
22201526	Ic22201526	16507	Grimsey Island	Iceland	66.4625	-18.2154	iOSL	48	0	0.192735	0.303356	Post-medieval	2/3 agreement
22201540	Ic22201540	16508	Grimsey Island	Iceland	66.4625	-18.2154	iOSL	48	0	0.139518	0.284475	Modern	2/3 agreement
22201542	Ic22201542	16509	Grimsey Island	Iceland	66.4625	-18.2154	iOSL	48	0.271359	0.173757	0.350898	Late Holocene	3/3 agreement
22101576	Ic22101576	16510	Grimsey Island	Iceland	66.4625	-18.2154	iOSL	48	0.199544	0.184267	0.364212	Late Holocene/ Post-medieval	Overlap
22200393	Ic22200393	16716	Grimsey Island	Iceland	66.5258	-18.2002	iOSL	48	0.160079	0.197295	0.316721	Post-medieval	2/3 agreement
22200379	Ic22200379	16717	Grimsey Island	Iceland	66.5258	-18.2002	iOSL	48	0.355206	0.2725	0.439983	Mid-Late Holocene	3/3 agreement
22200628	Ic22200628	16718	Grimsey Island	Iceland	66.5289	-18.2119	iOSL	48	0.141075	0.176085	0.312137	Post-medieval	3/3 agreement
22200647	Ic22200647	16719	Grimsey Island	Iceland	66.5289	-18.2119	iOSL	48	0.31781	0.254244	0.387706	Mid-Late Holocene	2/3 agreement
22200832	Ic22200832	16720	Grimsey Island	Iceland	66.5128	-18.198	iOSL	48	0.29916	0.247099	0.394872	Mid-Late Holocene	2/3 agreement
22200888	Ic22200888	16721	Grimsey Island	Iceland	66.5128	-18.198	iOSL	48	0.275685	0.220657	0.384028	Late Holocene	3/3 agreement
22200957	Ic22200957	16722	Grimsey Island	Iceland	66.5141	-18.1908	iOSL	48	0	0.172063	0.298254	Post-medieval	2/3 agreement
22200997	Ic22200997	16723	Grimsey Island	Iceland	66.5141	-18.1908	iOSL	48	0.157306	0.171392	0.316994	Post-medieval	2/3 agreement
22201090	Ic22201090	16724	Grimsey Island	Iceland	66.5284	-18.202	iOSL	48	0	0.15786	0.241656	Modern	2/3 agreement
22201964	Ic22201964	16725	Grimsey Island	Iceland	66.5087	-18.1872	iOSL	48	0.172332	0.166811	0.29216	Post-medieval	3/3 agreement
22202140	Ic22202140	16726	Grimsey Island	Iceland	66.5101	-18.1976	iOSL	48	0.12944	0.181014	0.310292	Post-medieval	3/3 agreement
22202200	Ic22202200	16727	Grimsey Island	Iceland	66.5101	-18.1976	iOSL	48	0	0.172326	0.296042	Post-medieval	2/3 agreement
22202717	FG22202717	16728	Fladen Ground	UK	59.1259	0.170111	iOSL	48	0	0.168469	0.299074	Post-medieval	2/3 agreement
22202743	FG22202743	16729	Fladen Ground	UK	59.127	0.160201	iOSL	48	0	0.160482	0.266887	Modern	2/3 agreement
22202755	FG22202755	16730	Fladen Ground	UK	59.127	0.160201	iOSL	48	0	0.155478	0.306366	Post-medieval	2/3 agreement
22202841	FG22202841	16731	Fladen Ground	UK	59.121	0.161821	iOSL	48	0	0.17606	0.280152	Post-medieval	2/3 agreement
22202987	FG22202987	16732	Fladen Ground	UK	59.1163	0.16365	iOSL	48	0	0.171056	0.263138	Modern	2/3 agreement
22203074	FG22203074	16733	Fladen Ground	UK	59.1248	0.161933	iOSL	48	0	0.158761	0.296847	Post-medieval	2/3 agreement
22202633	FG22202633	16734	Fladen Ground	UK	59.719	-0.33371	iOSL	48	0	0.178194	0.327774	Late Holocene	2/3 agreement
22202637	FG22202637	16735	Fladen Ground	UK	59.7192	-0.32756	iOSL	48	0	0.171439	0.260114	Modern	2/3 agreement
22202638	FG22202638	16736	Fladen Ground	UK	59.719	-0.32756	iOSL	48	0	0.158015	0.277036	Post-medieval	2/3 agreement
22202640	FG22202640	16737	Fladen Ground	UK	59.719	-0.32756	iOSL	48	0.231907	0.164771	0.197918	Post-medieval/ modern	Overlap
22203281	FG22203281	16738	Fladen Ground	UK	59.719	-0.32756	iOSL	48	0	0.168095	0.296627	Post-medieval	2/3 agreement
22202652	FG22202652	16739	Fladen Ground	UK	57.9296	1.62739	iOSL	48	0.510958	0.37533	0.263138	Early-Mid Holocene	3/3 agreement
22202653	FG22202653	16740	Fladen Ground	UK	57.9296	1.62739	iOSL	48	0.536651	0.405843	0.296847	Early-Mid Holocene	3/3 agreement
22202654	FG22202654	16741	Fladen Ground	UK	57.9296	1.62739	iOSL	48	0.526324	0.387043	0.327774	Early-Mid Holocene	3/3 agreement
22202655	FG22202655	16742	Fladen Ground	UK	57.9296	1.62739	iOSL	48	0.516766	0.358526	0.260114	Early-Mid Holocene	3/3 agreement
22202656	FG22202656	16743	Fladen Ground	UK	57.9296	1.62739	iOSL	48	0.517264	0.405121	0.277036	Early-Mid Holocene	3/3 agreement
22202659	FG22202659	16744	Fladen Ground	UK	57.9282	1.61111	iOSL	48	0.511073	0.384534	0.197918	Early-Mid Holocene	3/3 agreement
22202660	FG22202660	16745	Fladen Ground	UK	57.9282	1.61111	iOSL	48	0.52238	0.375596	0.296627	Early-Mid Holocene	3/3 agreement
22202661	FG22202661	16746	Fladen Ground	UK	57.9282	1.61111	iOSL	48	0.495842	0.35888	0.518806	Early-Mid Holocene	3/3 agreement
22202662	FG22202662	16747	Fladen Ground	UK	57.9282	1.61111	iOSL	48	0.504336	0.361905	0.487889	Early-Mid Holocene	3/3 agreement
22202663	FG22202663	16748	Fladen Ground	UK	57.9282	1.61111	iOSL	48	0.520946	0.395194	0.530287	Early-Mid Holocene	3/3 agreement

## Sheet: Bleaching
Average and standard deviation of amino acid concentration, percentage composition, extent of amino acid racemization (D/L) for free amino acid (FAA) and total hydrolisable amino acid (THAA) fraction for A. islandica from the North Sea used in bleaching experiments
All concentrations are reported in pmol/mg.
Lot number	Sample name	Lab ID	Area	Country	Latitude	Longitude	Age	Layer	Bleach time / h	FAA or THAA ?	n of samples	[Asx]	[Asx] 1 σ	[Glx]	[Glx] 1 σ	[Ser]	[Ser] 1 σ	[Thr]	[Thr] 1 σ	[His]	[His] 1 σ	[Gly]	[Gly] 1 σ	[Arg]	[Arg] 1 σ	[Ala]	[Ala] 1 σ	[Tyr]	[Tyr] 1 σ	[Val]	[Val] 1 σ	[Met]	[Met] 1 σ	[Phe]	[Phe] 1 σ	[Leu]	[Leu] 1 σ	[Ile]	[Ile] 1 σ	Total concentration	Total concentration 1 σ	Asx D/L	Asx D/L 1 σ	Glx D/L	Glx D/L 1 σ	Ser D/L	Ser D/L 1 σ	Ala D/L	Ala D/L 1 σ
20798	ArPeL1oOSL1u		North Sea	UK	58॰ 37’ N	1॰ 27’ E	modern	oOSL	0	FAA	3	36.8668	2.31318	23.6716	2.0248	46.5834	1.84064	10.1764	0.869462	0	0	112.721	6.02383	26.9604	5.14919	37.9647	3.11781	10.9533	0.763569	11.6356	2.13011	2.79551	0.541203	6.54672	0.548429	7.27149	0.732283	10.869	2.98662	345.016	24.712	0.258021	0.0108392	0.312098	0.0295159	0.356344	0.0410215	0.605318	0.0287486
20798	ArPeL1iOSL1u		North Sea	UK	58॰ 37’ N	1॰ 27’ E	modern	iOSL	0	FAA	3	28.0163	6.88848	18.9883	5.19571	32.7889	1.44744	7.59498	0.274312	0	0	86.7262	5.01043	25.9653	2.68559	38.4157	2.25748	10.0287	0.349768	10.4792	0.511491	2.73224	0.653925	4.68942	0.0252226	5.99799	0.260721	8.78195	1.0644	281.205	15.3562	0.310928	0.0105693	0.435568	0.0145627	0.331537	0.0226689	0.611608	0.0280638
20798	ArPeL1ISL1u		North Sea	UK	58॰ 37’ N	1॰ 27’ E	modern	ISL	0	FAA	3	33.7736	0.340014	27.4049	0.551028	25.4348	1.41195	7.60104	0.864174	0	0	101.493	4.14345	20.8159	5.84382	37.553	1.7286	9.5106	0.269588	14.526	1.30837	0	0	5.7832	1.19194	5.89123	0.218052	9.89242	0.760357	299.679	2.59195	0.352141	0.0149668	0.400384	0.0194785	0.215568	0.0276584	0.875579	0.00646435
20798	ArPeL1oOSL1b24		North Sea	UK	58॰ 37’ N	1॰ 27’ E	modern	oOSL	24	FAA	3	4.22434	0.844461	1.48151	1.17423	12.718	0.532861	0.912433	1.29038	0	0	25.3771	2.33712	0	0	0	0	0	0	0	0	0	0	0	0	0	0	0	0	44.7134	5.0475	0	0	#DIV/0!	#DIV/0!	0.458183	0.0442103	#DIV/0!	#DIV/0!
20798	ArPeL1iOSL1b24		North Sea	UK	58॰ 37’ N	1॰ 27’ E	modern	iOSL	24	FAA	3	6.36169	3.4795	2.38734	0.756298	20.5548	16.8857	2.93573	2.82812	0	0	28.3082	13.1744	0	0	4.30851	6.09315	0	0	0	0	0	0	0	0	0	0	0	0	64.8563	42.5017	0	0	0	0	0.351219	0.248634	#DIV/0!	#DIV/0!
20798	ArPeL1ISL1b24		North Sea	UK	58॰ 37’ N	1॰ 27’ E	modern	ISL	24	FAA	3	7.73081	0.506624	3.85381	0.244763	6.35322	0.366192	3.08936	0.671442	0	0	26.3391	4.11836	3.28531	2.43021	0	0	0	0	0	0	0	0	0	0	0	0	0	0	50.6516	1.84972	0.248434	0.0257528	0	0	0.559719	0.195209	#DIV/0!	#DIV/0!
20798	ArPeL1oOSL1b48		North Sea	UK	58॰ 37’ N	1॰ 27’ E	modern	oOSL	48	FAA	3	5.19876	0.664289	2.58592	0.516143	14.7504	1.01642	4.19829	1.60726	0	0	27.7738	1.33924	7.99432	0.713565	0	0	0	0	0	0	0	0	0	0	0	0	0	0	62.5014	4.94219	0	0	0	0	0.391822	0.0427115	#DIV/0!	#DIV/0!
20798	ArPeL1iOSL1b48		North Sea	UK	58॰ 37’ N	1॰ 27’ E	modern	iOSL	48	FAA	3	4.9879	3.39286	1.93697	1.37849	8.54735	0.702819	0	0	0	0	18.8225	1.7474	4.26078	3.43858	0	0	0	0	0	0	0	0	0	0	0	0	0	0	38.5555	9.80695	0.0560475	0.0792631	#DIV/0!	#DIV/0!	0.422707	0.0447578	#DIV/0!	#DIV/0!
20798	ArPeL1ISL1b48		North Sea	UK	58॰ 37’ N	1॰ 27’ E	modern	ISL	48	FAA	3	7.0608	0.183206	4.07034	0.0302954	4.75889	0.833501	0	0	0	0	20.889	11.1027	0	0	0	0	0	0	0	0	0	0	0	0	0	0	0	0	36.779	11.4918	0	0	0	0	0	0	#DIV/0!	#DIV/0!
20798	ArPeL1oOSL1b72		North Sea	UK	58॰ 37’ N	1॰ 27’ E	modern	oOSL	72	FAA	3	7.10603	1.03319	4.11756	0.530936	15.7618	0.692315	2.02903	2.86948	0	0	29.376	2.69751	8.44248	0.950993	0	0	0	0	0	0	0	0	0	0	0	0	0	0	66.8329	6.72102	0	0	0	0	0.41264	0.0202506	#DIV/0!	#DIV/0!
20798	ArPeL1iOSL1b72		North Sea	UK	58॰ 37’ N	1॰ 27’ E	modern	iOSL	72	FAA	3	2.97114	2.11932	1.6883	1.2119	7.02774	1.00746	0	0	0	0	18.9013	2.36238	3.4296	2.4929	0	0	0	0	0	0	0	0	0	0	0	0	0	0	34.0181	4.8703	#DIV/0!	#DIV/0!	#DIV/0!	#DIV/0!	0	0	#DIV/0!	#DIV/0!
20798	ArPeL1ISL1b72		North Sea	UK	58॰ 37’ N	1॰ 27’ E	modern	ISL	72	FAA	3	6.86336	0.149455	3.85695	0.0916245	4.32779	0.252661	0	0	0	0	30.3885	1.68929	0	0	0	0	0	0	0	0	0	0	0	0	0	0	0	0	45.4366	1.65733	0	0	0	0	0	0	#DIV/0!	#DIV/0!
20798	ArPeL1oOSL1u		North Sea	UK	58॰ 37’ N	1॰ 27’ E	modern	oOSL	0	THAA	3	4000.27	172.205	3079.17	167.277	1984.95	166.54	1816.87	148.674	0	0	15867.3	913.546	3477.98	201.746	2753.34	175.913	2949.36	245.803	1774.68	104.881	490.161	316.301	1056.79	44.5784	1262.52	59.0492	74.4483	7.64478	40587.8	1603.94	0.122866	0.000892373	0.0661762	0.000547501	0.0792097	0.00319432	0.0594405	0.00453592
20798	ArPeL1iOSL1u		North Sea	UK	58॰ 37’ N	1॰ 27’ E	modern	iOSL	0	THAA	3	2597.2	387.124	1901.63	236.258	1106.98	131.641	945.252	147.055	0	0	7145.26	3150.09	1953.79	264.132	2018.5	234.641	1281.05	417.499	1009.09	213.424	223.392	153.527	629.869	101.583	730.939	101.396	62.0415	30.3267	21605	3773.89	0.136932	0.00483116	0.0839785	0.00368258	0.0903798	0.00328842	0.0722282	0.00490357
20798	ArPeL1ISL1u		North Sea	UK	58॰ 37’ N	1॰ 27’ E	modern	ISL	0	THAA	3	4866.78	2148.5	4310.34	1205.93	2574.85	444.054	2791.38	679.373	0	0	7791.26	3395.07	3042.6	704.252	3705.71	743.437	2458	843.061	2484.89	849.542	632.959	228.433	1317.11	271.815	1619.12	308.461	89.6579	28.5492	37684.7	11466.9	0.152086	0.064249	0.0616514	0.0040789	0.0388638	0.00883204	0.0558713	0.00847412
20798	ArPeL1oOSL1b24		North Sea	UK	58॰ 37’ N	1॰ 27’ E	modern	oOSL	24	THAA	3	481.976	30.2345	359.049	22.5317	204.001	16.5485	212.031	17.3354	23.256	2.12759	269.355	21.791	303.544	21.4387	302.989	20.1693	96.8331	26.2533	286.398	18.4835	7.14714	2.85614	115.1	8.76352	144.593	10.9856	33.3102	1.10345	2839.58	210.271	0.127493	0.00181404	0.0624603	0.000579645	0.222424	0.00861862	0.0422774	0.00161064
20798	ArPeL1iOSL1b24		North Sea	UK	58॰ 37’ N	1॰ 27’ E	modern	iOSL	24	THAA	3	312.898	82.0126	212.779	37.9838	106.811	14.7109	111.213	15.3371	8.73636	1.46393	137.347	9.34186	184.032	31.9445	232.819	32.2486	44.7533	19.1464	178.487	26.2781	3.43112	4.85233	64.3592	12.0392	80.2433	14.0572	25.7335	3.46808	1703.64	297.602	0.196701	0.0830248	0.0708122	0.00120294	0.222169	0.0178429	0.0495243	0.00479283
20798	ArPeL1ISL1b24		North Sea	UK	58॰ 37’ N	1॰ 27’ E	modern	ISL	24	THAA	3	1177.87	144.148	861.172	103.519	400.107	52.0751	551.263	68.9947	39.9501	3.69318	707.32	50.5365	490.349	66.0733	631.264	81.8688	392.953	69.937	654.466	79.0105	15.1886	15.8203	208.247	27.9815	220.552	25.2482	47.9793	5.7549	6398.68	774.378	0.113697	0.00175588	0.0578802	0.0010979	0.179777	0.00244304	0.0447593	0.00425029
20798	ArPeL1oOSL1b48		North Sea	UK	58॰ 37’ N	1॰ 27’ E	modern	oOSL	48	THAA	3	440.356	45.7189	319.751	37.5602	196.266	24.282	195.082	11.9764	22.7871	5.6164	400.76	235.254	345.814	90.0407	278.718	21.7336	58.2712	14.3456	261.001	15.7382	0	0	105.773	7.02079	131.61	8.3742	40.6799	2.15745	2796.87	472.679	0.131241	0.00822699	0.0650577	0.00395254	0.257565	0.0165442	0.044275	0.00044075
20798	ArPeL1iOSL1b48		North Sea	UK	58॰ 37’ N	1॰ 27’ E	modern	iOSL	48	THAA	3	213.527	53.3486	144.855	46.9981	80.6533	16.5776	81.1164	23.1692	7.46983	1.90559	115.85	29.531	130.637	31.9101	169.962	43.5028	13.4074	5.20118	115.267	38.0219	0	0	44.25	12.9344	53.7386	14.4916	24.7331	1.81018	1195.47	309	0.139705	0.00462899	0.0704599	0.00353452	0.224243	0.0491326	0.0476134	0.00473348
20798	ArPeL1ISL1b48		North Sea	UK	58॰ 37’ N	1॰ 27’ E	modern	ISL	48	THAA	3	1356.76	231.163	951.909	207.313	461.683	71.51	628.21	107.403	43.1091	5.58524	794.205	143.856	513.348	87.5837	729.068	115.898	341.19	156.775	710.487	166.5	26.6003	15.8307	229.865	41.7134	239.501	39.921	39.9651	2.62298	7065.9	1344.55	0.119104	0.00349576	0.0559988	0.00325321	0.209465	0.00438153	0.0435993	0.00430202
20798	ArPeL1oOSL1b72		North Sea	UK	58॰ 37’ N	1॰ 27’ E	modern	oOSL	72	THAA	3	483.156	33.2173	356.182	21.0871	190.687	12.4562	208.793	9.51231	21.0584	4.38495	243.314	11.7649	309.101	20.6121	295.718	18.615	18.0674	10.0448	275.283	20.3351	0	0	109.562	15.5199	144.813	8.07913	43.1067	2.9736	2698.84	184.141	0.142269	0.00111098	0.0713	0.000555174	0.285517	0.00898683	0.0512745	0.00593247
20798	ArPeL1iOSL1b72		North Sea	UK	58॰ 37’ N	1॰ 27’ E	modern	iOSL	72	THAA	3	221.71	58.8447	151.297	54.6004	89.4687	5.21758	89.9711	8.91757	8.23931	2.12286	144.64	12.7474	127.415	27.9298	198.717	3.82621	14.2686	7.59542	137.486	14.5925	0	0	50.8425	4.03621	63.1118	3.79657	20.4069	7.51225	1317.57	176.09	0.14841	0.00244503	0.0808564	0.00358234	0.275241	0.0112758	0.0526486	0.00120445
20798	ArPeL1ISL1b72		North Sea	UK	58॰ 37’ N	1॰ 27’ E	modern	ISL	72	THAA	3	1424.48	61.0938	1031.08	40.7267	475.158	11.0464	654.958	29.4119	46.902	3.02205	786.988	64.8721	538.944	49.6131	755.605	15.1836	257.221	151.341	776.543	17.4161	7.93483	5.953	249.8	9.2277	256.884	8.76185	40.2087	12.3745	7302.7	46.8165	0.129485	0.000819717	0.0623636	0.00137604	0.221813	0.00290881	0.04336	0.00177323
1787	ArWeyoOSLuF		Weybourne Crag		52° 56.55’ N	1° 08.33’ E	Early Pleistocene	oOSL	0	FAA	2	376.751	57.6191	120.896	20.0706	21.2608	3.32522	22.952	1.70722	9.99924	1.46919	379.132	55.122	246.119	30.4013	808.059	60.9355	123.861	5.05169	378.986	36.9159	57.2722	19.9182	121.58	15.2276	118.993	24.3854	7.62811	0.0405123	2793.49	312.497	0.849392	0.000868783	0.626475	0.0102385	0.295732	0.119839	1.06071	0.0095117
1787	ArWeyiOSLuF		Weybourne Crag		52° 56.55’ N	1° 08.33’ E	Early Pleistocene	iOSL	0	FAA	2	409.546	67.5327	138.363	20.473	18.2839	7.02584	22.1327	0.318536	14.8826	1.17055	392.352	84.8411	243.132	5.91193	808.422	71.8772	133.236	9.46659	378.901	35.6143	41.4964	15.337	120.145	17.1954	112.122	24.9045	7.69503	0.0969101	2840.71	149.791	0.854865	0.00234543	0.631622	0.00498966	0.388341	0.194244	1.06031	0.0196955
1787	ArWeyISLuF		Weybourne Crag		52° 56.55’ N	1° 08.33’ E	Early Pleistocene	ISL	0	FAA	2	510.801	84.1933	137.676	17.8408	7.05563	0.5119	23.8985	3.4989	3.53057	3.53057	410.425	75.03	94.7387	15.9408	549.395	60.0706	119.512	17.9586	268.967	43.5546	35.9859	8.65997	76.0846	15.52	54.6941	7.04402	13.399	6.42513	2306.16	352.718	0.883819	0.000530788	0.643996	0.00913865	0.856814	0.856814	0.981929	0.0615289
1787	ArWeyoOSLb24F		Weybourne Crag		52° 56.55’ N	1° 08.33’ E	Early Pleistocene	oOSL	24	FAA	2	194.499	30.9474	64.6561	9.81448	5.31817	0.327081	12.4942	2.75581	13.9625	5.41271	239.457	68.4444	157.951	42.8724	441.819	104.615	47.5625	27.0434	212.333	56.5781	20.197	9.64756	70.8403	19.0257	70.5715	24.3306	7.60706	0.118178	1559.27	382.401	0.855755	0.00152887	0.644285	0.000288453	1.29659	0.0117994	1.0799	0.0150798
1787	ArWeyiOSLb24F		Weybourne Crag		52° 56.55’ N	1° 08.33’ E	Early Pleistocene	iOSL	24	FAA	2	233.525	70.74	77.6283	27.0954	4.60426	1.09877	7.10404	2.80067	0	0	163.184	47.4432	91.1898	53.5233	278.393	93.5265	16.8477	6.18715	125.808	48.7491	0	0	43.1075	17.1405	42.1464	20.4914	7.53021	0.0321521	1091.07	388.764	0.858239	0.00259431	0.647472	0.0064763	0.939192	0.172127	1.04785	0.0252282
1787	ArWeyISLb24F		Weybourne Crag		52° 56.55’ N	1° 08.33’ E	Early Pleistocene	ISL	24	FAA	2	332.695	69.3279	87.2455	15.8439	5.8232	0.722237	14.4057	2.75945	9.3923	1.98577	258.344	62.5748	60.2913	11.7078	344.663	76.51	53.9369	34.4159	161.819	33.2304	19.2475	19.2475	44.302	9.3071	34.8618	7.09136	7.71339	0.274495	1434.74	306.504	0.893476	0.000642974	0.654567	0.00520087	1.25452	0.16781	0.957733	0.0255061
1787	ArWeyoOSLb48F		Weybourne Crag		52° 56.55’ N	1° 08.33’ E	Early Pleistocene	oOSL	48	FAA	2	323.423	168.605	110.116	56.698	6.89978	1.07041	16.9581	5.74279	19.5181	10.1561	273.3	106.486	179.987	61.0843	489.369	156.83	62.7219	29.5362	238.325	80.4203	17.151	4.35574	82.5816	28.4038	80.5823	33.2694	7.30755	0.160571	1908.24	733.786	0.846724	0.0070607	0.6198	0.010178	1.20035	0.626118	1.05048	0.00474608
1787	ArWeyiOSLb48F		Weybourne Crag		52° 56.55’ N	1° 08.33’ E	Early Pleistocene	iOSL	48	FAA	2	258.457	115.912	91.384	46.2468	5.37644	0.93919	9.90293	2.62355	6.69493	6.69493	179.668	75.508	106.175	12.8808	303.429	74.3204	27.8502	12.0835	139.665	30.6857	6.91139	6.91139	48.2983	13.4581	45.5599	15.928	7.77508	0.42597	1237.15	413.766	0.85028	0.00547886	0.626505	0.0107172	1.18096	0.17472	1.04775	0.0118156
1787	ArWeyISLb48F		Weybourne Crag		52° 56.55’ N	1° 08.33’ E	Early Pleistocene	ISL	48	FAA	2	411.421	40.7498	111.747	10.812	12.3516	5.78709	19.1065	3.75695	0	0	354.094	76.7725	76.1152	11.4444	455.23	53.5957	62.1821	34.5303	208.214	24.1682	3.32424	3.32424	63.707	13.5422	45.6149	7.38405	21.0665	13.3685	1844.17	292.588	0.883498	0.015441	0.634622	0.0275021	0.757877	0.331105	0.907508	0.0034384
1787	ArWeyoOSLb72F		Weybourne Crag		52° 56.55’ N	1° 08.33’ E	Early Pleistocene	oOSL	72	FAA	2	249.153	162.193	83.5048	52.6104	3.12902	3.12902	17.2292	1.28744	14.9832	14.9832	223.01	131.084	154.465	86.4209	378.045	214.284	49.6064	30.8653	188.646	108.486	170.305	166.635	62.7504	35.5421	63.6375	39.9966	7.53125	0.0988645	1666	1045.04	0.869327	0.00121228	0.637455	0.0106713	#DIV/0!	#DIV/0!	1.13063	0.0494465
1787	ArWeyiOSLb72F		Weybourne Crag		52° 56.55’ N	1° 08.33’ E	Early Pleistocene	iOSL	72	FAA	2	109.762	24.0001	28.8939	2.70642	5.162	2.72141	9.6094	5.63165	1.96021	1.96021	187.097	102.095	52.1857	7.07269	259.078	118.835	18.2524	9.69487	116.926	54.9205	13.4523	6.47291	36.3507	13.8986	26.1556	10.242	10.3404	2.76547	875.226	359.096	0.871808	0.00972437	0.654049	0.00935011	0.35225	0.35225	0.965969	0.0919726
1787	ArWeyISLb72F		Weybourne Crag		52° 56.55’ N	1° 08.33’ E	Early Pleistocene	ISL	72	FAA	2	303.261	113.861	89.5078	24.4711	5.28743	0.301096	15.6341	3.45916	6.45763	6.45763	242.238	22.052	133.435	15.5833	400.605	0.898292	27.5036	3.73957	200.24	6.85368	18.5295	1.06052	61.9802	3.74161	56.9771	8.77505	8.17603	0.125052	1569.83	138.346	0.872944	0.0229566	0.639739	0.0138124	1.67454	0.0434399	1.04847	0.00505789
1787	ArWeyoOSLuH*		Weybourne Crag		52° 56.55’ N	1° 08.33’ E	Early Pleistocene	oOSL	0	THAA	2	695.241	52.8759	814.842	14.1918	276.865	7.01349	1048.85	409.495	76.1385	1.37443	1089.73	80.9847	412.789	48.1796	1593.95	286.482	147.635	4.96628	764.912	78.8764	113.941	7.396	328.684	41.584	410.891	79.2037	7.99055	0.071361	7782.46	1001.54	0.533188	0.0394846	0.387736	0.00486127	0.0608117	0.00728319	0.526779	0.10471
1787	ArWeyiOSLuH*		Weybourne Crag		52° 56.55’ N	1° 08.33’ E	Early Pleistocene	iOSL	0	THAA	2	643.882	72.9222	783.612	88.1218	285.617	4.81615	677.992	164.894	37.7926	0	871.132	56.9792	569.485	22.19	1098.07	121.047	89.0644	8.85788	610.361	57.078	98.2239	13.5109	262.056	21.621	346.788	24.9926	10.5665	0.74555	6384.64	619.632	0.516868	0.0374367	0.35581	0.0405084	0.0610268	0.141366	0.595536	0.0570533
1787	ArWeyISLuH*		Weybourne Crag		52° 56.55’ N	1° 08.33’ E	Early Pleistocene	ISL	0	THAA	2	731.609	100.001	668.41	88.1544	137.905	41.0004	160.25	58.9765	33.3613	1.65524	647.118	114.068	306.033	15.6385	709.494	92.2336	107.19	40.0864	449.14	62.2435	76.0657	36.9689	164.812	32.306	188.24	50.7638	11.2037	3.43147	4390.83	657.355	0.610588	0.0626316	0.424204	0.0380894	4.96997	4.91723	0.728953	0.0960835
1787	ArWeyoOSLb24H*		Weybourne Crag		52° 56.55’ N	1° 08.33’ E	Early Pleistocene	oOSL	24	THAA	2	396.388	167.762	445.246	185.742	30.6859	11.0126	612.565	408.266	36.8233	20.1208	440.384	205.13	263.544	113.359	796.343	351.381	72.8759	38.9937	420.653	175.427	50.7485	14.1113	171.949	72.3959	164.97	78.4913	8.03043	0.11666	3911.21	1842.31	0.74747	0.00919117	0.549313	0.00993816	0.42922	0.0627111	0.791388	0.0616757
1787	ArWeyiOSLb24H*		Weybourne Crag		52° 56.55’ N	1° 08.33’ E	Early Pleistocene	iOSL	24	THAA	2	230.58	72.9222	238.702	88.1218	24.8347	4.81615	227.095	164.894	0	0	198.413	56.9792	165.609	22.19	340.121	121.047	20.5756	8.85788	194.085	57.078	13.5109	13.5109	77.8101	21.621	79.166	24.9926	7.84351	0.74555	1818.35	619.632	0.693884	0.0374367	0.491501	0.0405084	0.141366	0.141366	0.856152	0.0570533
1787	ArWeyISLb24H*		Weybourne Crag		52° 56.55’ N	1° 08.33’ E	Early Pleistocene	ISL	24	THAA	2	406.372	28.9153	348.107	25.3261	35.8713	9.65184	65.9626	18.931	6.32425	6.32425	336.767	102.387	170.502	6.35605	416.945	78.3888	113.993	32.371	273.51	43.2129	19.6242	2.89923	94.3481	19.4518	80.187	19.3093	13.7464	5.08067	2382.26	380.158	0.755237	0.0133192	0.536782	0.0138305	0.201485	0.0255291	0.961629	0.0456853
1787	ArWeyoOSLb48H*		Weybourne Crag		52° 56.55’ N	1° 08.33’ E	Early Pleistocene	oOSL	48	THAA	2	451.367	158.042	506.825	155.991	36.345	3.14682	650.255	298.883	37.6635	4.48403	453.561	90.6326	306.932	74.8142	870.881	177.38	32.9712	0.711099	455.22	97.7312	79.4576	7.05676	181.877	41.4432	175.035	47.9697	8.78834	0.573977	4247.18	1156.29	0.743805	0.00897278	0.554362	0.0100523	0.405795	0.0557892	0.768289	0.0388193
1787	ArWeyiOSLb48H*		Weybourne Crag		52° 56.55’ N	1° 08.33’ E	Early Pleistocene	iOSL	48	THAA	2	217.061	21.9259	224.07	12.2247	33.0202	3.39275	205.714	110.914	11.9357	11.9357	216.686	62.8463	179.712	40.9367	382.428	85.1707	11.0588	2.61197	226.469	50.7487	45.9586	0.930907	95.0391	21.3423	88.6454	28.2682	8.52256	0.00990518	1946.32	383.096	0.691774	0.00113702	0.500175	0.00933965	0.159791	0.0231891	0.852727	0.0426445
1787	ArWeyISLb48H*		Weybourne Crag		52° 56.55’ N	1° 08.33’ E	Early Pleistocene	ISL	48	THAA	2	301.456	51.5902	281.495	7.2912	58.1439	26.5374	61.4886	10.5273	0	0	377.416	118.886	124.677	28.0643	382.003	26.9211	29.7539	3.24659	232.252	0.524177	50.8119	3.67943	87.1654	7.71676	84.1784	16.0427	21.3488	13.0341	2092.19	139.122	0.685847	0.0608851	0.475902	0.0646024	0.0889694	0.0889694	0.835975	0.14716
1787	ArWeyoOSLb72H*		Weybourne Crag		52° 56.55’ N	1° 08.33’ E	Early Pleistocene	oOSL	72	THAA	2	321.175	79.564	369.936	77.9133	27.852	2.19493	528.698	277.701	30.698	11.9398	366.317	127.445	152.152	75.2382	689.031	203.626	20.6452	12.6314	369.775	105.026	68.1168	8.89907	155.472	46.0491	140.615	49.1342	8.25812	0.116461	3248.74	1077.24	0.742344	0.0136453	0.549145	0.0146558	0.456489	0.124799	0.754326	0.0315006
1787	ArWeyiOSLb72H*		Weybourne Crag		52° 56.55’ N	1° 08.33’ E	Early Pleistocene	iOSL	72	THAA	2	412.01	243.318	378.684	202.592	17.9553	4.47404	76.0848	9.03339	5.08351	5.08351	229.364	134.038	112.923	4.57843	323.144	80.1198	32.5953	2.3946	189.645	40.0983	28.2727	12.5856	77.7161	13.4743	117.783	55.6367	31.0947	11.9304	2032.36	642.042	0.756987	0.0231983	0.535938	0.0194267	0.146962	0.146962	0.817466	0.0396543
1787	ArWeyISLb72H*		Weybourne Crag		52° 56.55’ N	1° 08.33’ E	Early Pleistocene	ISL	72	THAA	2	416.526	94.3841	398.255	46.3929	25.0387	0.33333	267.324	214.658	16.9202	0.567898	283.454	64.4128	150.66	54.5885	502.793	34.6902	19.2134	5.97037	284.232	18.843	49.012	7.22869	112.534	15.5966	180.964	112.684	48.4189	39.2244	2755.34	272.13	0.7617	0.0290364	0.548146	0.0123803	0.312436	0.0140547	0.766436	0.0735009
[truncated: 30 more columns]

## Sheet: High temperature
Average and standard deviation of amino acid concentration, percentage composition, extent of amino acid racemization (D/L) for free amino acid (FAA) and total hydrolisable amino acid (THAA) fraction for A. islandica from the North Sea used in bleaching experiments
All concentrations are reported in pmol/mg.
Lot number	Sample name	Lab ID	Area	Country	Latitude	Longitude	Age	Layer	Bleach time / h	Temperature / °C	Heating time / h	FAA or THAA ?	n of samples	[Asx]	[Asx] 1 σ	[Glx]	[Glx] 1 σ	[Ser]	[Ser] 1 σ	[Thr]	[Thr] 1 σ	[His]	[His] 1 σ	[Gly]	[Gly] 1 σ	[Arg]	[Arg] 1 σ	[Ala]	[Ala] 1 σ	[Tyr]	[Tyr] 1 σ	[Val]	[Val] 1 σ	[Met]	[Met] 1 σ	[Phe]	[Phe] 1 σ	[Leu]	[Leu] 1 σ	[Ile]	[Ile] 1 σ	Total concentration	Total concentration 1 σ	Asx D/L	Asx D/L 1 σ	Glx D/L	Glx D/L 1 σ	Ser D/L	Ser D/L 1 σ
20798	ArPeoOSLb8kFp		North Sea	UK	58॰ 37’ N	1॰ 27’ E	modern	oOSL	48	140	8	FAA	3	82.1996	40.2296	25.7824	12.9584	35.3818	2.51995	16.902	1.31117	4.47165	1.25948	119.259	9.13724	96.0922	9.11714	114.342	7.32078	35.7374	2.82724	39.6167	3.66527	0	0	23.2904	2.64687	16.0353	7.08471	12.6973	0.233506	621.808	77.6147	0.500215	0.127865	0.418973	0.0150625	0.877152	0.0418894
20798	ArPeiOSLb8kFp		North Sea	UK	58॰ 37’ N	1॰ 27’ E	modern	iOSL	48	140	8	FAA	3	76.5897	24.1374	21.3353	8.84884	25.6539	5.11585	11.6649	2.30917	2.71914	0.193165	98.3912	4.15028	49.0043	17.576	96.9091	21.3474	26.3311	7.70066	28.6756	7.98102	0	0	18.3943	3.14075	16.4842	4.84482	10.1573	2.29002	482.31	106.55	0.5782	0.123575	0.421067	0.0100135	0.905222	0.0245293
20798	ArPeISLb8kFp		North Sea	UK	58॰ 37’ N	1॰ 27’ E	modern	ISL	48	140	8	FAA	3	189.772	27.4321	56.5061	8.10706	68.0513	9.26441	47.3046	6.19642	3.83372	0.863734	252.409	12.0955	102.032	16.8551	232.782	33.47	45.7959	9.80148	58.8462	8.37216	2.80292	2.22919	26.3047	3.13395	24.2295	3.35625	11.9956	0.44085	1122.67	130.265	0.400394	0.00746225	0.405598	0.00439533	0.915329	0.0136721
20798	ArPeoOSLb24kFp		North Sea	UK	58॰ 37’ N	1॰ 27’ E	modern	oOSL	48	140	24	FAA	3	206.711	56.6841	39.9962	12.5284	22.7339	1.39369	17.2929	1.76631	7.31194	1.91135	166.569	10.9141	153.966	4.86292	202.331	16.0012	64.2205	2.83637	90.9512	8.28002	2.63228	2.2447	47.538	4.44478	39.6916	1.00353	20.7584	0.111159	1082.7	96.432	0.815439	0.0043762	0.546749	0.00793407	0.947971	0.0155617
20798	ArPeiOSLb24kFp		North Sea	UK	58॰ 37’ N	1॰ 27’ E	modern	iOSL	48	140	24	FAA	3	109.03	12.8431	24.0473	3.84192	15.0998	2.42293	9.51987	1.66586	3.13024	0.897233	143.545	14.3948	49.7902	10.2665	167	24.1676	31.2609	16.3496	56.6204	5.96792	5.43183	5.19723	27.3883	1.67448	21.6678	2.26962	15.6788	1.51996	679.211	85.2382	0.814253	0.00766323	0.586428	0.0125046	0.87887	0.0424822
20798	ArPeISLb24kFp		North Sea	UK	58॰ 37’ N	1॰ 27’ E	modern	ISL	48	140	24	FAA	3	331.603	126.29	61.1906	16.0193	44.9422	16.4211	41.5513	13.7366	4.0217	1.06793	360.026	110.255	89.1406	33.944	356.263	114.474	90.4068	27.9817	132.835	42.4637	2.71666	2.74508	51.5608	15.8175	34.3299	10.5972	18.453	3.05638	1619.04	522.55	0.697908	0.168371	0.506157	0.0237171	0.966036	0.135472
20798	ArPeoOSLb48kFp		North Sea	UK	58॰ 37’ N	1॰ 27’ E	modern	oOSL	48	140	48	FAA	3	141.298	40.0527	32.4698	18.0849	11.3491	1.46738	10.4327	2.43511	2.58694	0.604121	209.718	22.6982	128.691	20.7501	210.971	25.6528	55.9836	7.98248	99.3168	7.95603	2.0367	2.88033	42.1446	2.24218	36.3041	4.92847	22.8229	1.35844	1006.13	66.559	0.843343	0.0100255	0.636303	0.00224169	1.05564	0.125396
20798	ArPeiOSLb48kFp		North Sea	UK	58॰ 37’ N	1॰ 27’ E	modern	iOSL	48	140	48	FAA	3	135.537	8.76977	22.3478	2.81964	10.6901	1.05973	9.79371	0.409433	3.02877	0.722987	188.895	8.27365	106.148	23.3451	213.4	5.74623	52.1315	3.58839	79.5374	4.25994	0	0	32.5986	1.61389	28.5798	2.58009	19.2585	0.856985	901.946	32.7132	0.845955	0.00360752	0.650107	0.00382506	0.97594	0.0483384
20798	ArPeISLb48kFp		North Sea	UK	58॰ 37’ N	1॰ 27’ E	modern	ISL	48	140	48	FAA	3	481.172	9.83731	63.3121	4.28436	45.3191	0.691488	49.7886	1.77176	2.77492	0.508071	639.483	23.9589	86.0176	4.08418	585.452	19.2748	115.927	45.2265	216.51	10.3924	14.448	20.4326	64.7291	3.22038	49.7749	7.68471	26.5679	0.877399	2441.28	100.032	0.892019	0.00334062	0.599521	0.00888094	1.0929	0.0654625
20798	ArPeoOSLb8kH*p		North Sea	UK	58॰ 37’ N	1॰ 27’ E	modern	oOSL	48	140	8	THAA	3	293.561	64.909	236.018	63.5915	69.3478	5.89111	104.051	9.66156	13.6126	3.02512	329.764	29.9492	179.026	26.6043	296.594	28.9046	68.2403	14.2308	201.728	10.0186	37.351	14.1095	91.3855	4.53889	110.959	5.09062	22.3996	2.437	2054.04	141.934	0.604302	0.0759496	0.296792	0.0325498	0.745225	0.0902072
20798	ArPeiOSLb8kH*p		North Sea	UK	58॰ 37’ N	1॰ 27’ E	modern	iOSL	48	140	8	THAA	3	251.644	14.9267	163.149	11.7417	56.1736	1.9436	76.4491	3.30372	11.2577	1.10961	276.424	9.20172	129.658	15.1016	265.448	11.0394	55.6977	10.0865	162.088	5.72569	41.5884	3.74922	73.2402	2.87739	80.008	11.5351	18.1815	0.330212	1661.01	45.7009	0.592595	0.0762142	0.289571	0.0209592	0.748609	0.110676
20798	ArPeISLb8kH*p		North Sea	UK	58॰ 37’ N	1॰ 27’ E	modern	ISL	48	140	8	THAA	3	994.781	72.5257	737.376	53.2683	215.747	8.40826	313.245	11.2078	59.2901	14.3144	767.948	16.74	467.259	37.6996	656.057	40.17	419.894	14.9425	589.075	23.3111	31.2492	10.4961	207.993	11.5954	200.394	6.48823	24.9545	4.90728	5685.26	204.534	0.718786	0.00982585	0.248774	0.00476077	0.705006	0.0101328
20798	ArPeoOSLb24kH*p		North Sea	UK	58॰ 37’ N	1॰ 27’ E	modern	oOSL	48	140	24	THAA	3	376.047	108.361	380.455	136.746	28.9846	2.37529	63.8092	3.24149	18.3105	10.1024	330.14	31.5493	151.176	39.7177	282.09	18.4053	63.9381	25.9014	180.794	2.2678	25.6026	15.9933	80.463	1.7561	83.8524	2.10869	29.324	2.07982	2094.98	247.763	0.780265	0.000995899	0.443684	0.00835271	0.889471	0.0606539
20798	ArPeiOSLb24kH*p		North Sea	UK	58॰ 37’ N	1॰ 27’ E	modern	iOSL	48	140	24	THAA	3	191.659	31.7098	169.825	33.1363	17.001	3.54426	29.4228	4.26012	9.89152	5.78413	229.415	20.7614	72.6687	5.71326	224.185	22.1372	38.8143	14.7267	125.09	8.40786	21.4486	8.634	65.995	16.1065	41.5669	21.2329	18.0119	7.63477	1254.99	110.652	0.750682	0.0245664	0.462109	0.019342	0.868011	0.022052
20798	ArPeISLb24kH*p		North Sea	UK	58॰ 37’ N	1॰ 27’ E	modern	ISL	48	140	24	THAA	3	887.149	72.0219	743.781	40.6716	129.705	21.5554	223.161	42.554	62.4002	14.0016	834.81	48.3863	352.336	29.6238	767.946	49.9001	411.623	31.429	572.501	29.4929	49.6879	22.7248	199.984	8.37253	132.05	85.6774	44.2651	6.43763	5411.4	306.971	0.691385	0.14036	0.362052	0.0547045	0.696666	0.170667
20798	ArPeoOSLb48kH*p		North Sea	UK	58॰ 37’ N	1॰ 27’ E	modern	oOSL	48	140	48	THAA	3	152.911	9.07208	164.213	7.72306	18.7722	3.10479	61.1768	2.77033	26.0434	2.18487	285.392	4.76974	159.389	20.8323	334.439	15.6569	43.3804	22.4373	231.367	23.8072	0	0	86.103	5.97423	86.34	9.26125	38.4458	2.01072	1687.97	42.0515	0.803248	0.0325869	0.514146	0.0059209	0.725567	0.16669
20798	ArPeiOSLb48kH*p		North Sea	UK	58॰ 37’ N	1॰ 27’ E	modern	iOSL	48	140	48	THAA	3	116.052	22.7186	101.847	23.457	12.5955	0.542089	25.9165	1.22845	17.0687	1.31017	234.478	10.8902	46.2074	3.19281	232.299	9.00436	41.0712	12.3946	110.097	4.94521	20.1992	7.50271	46.6593	1.77729	41.2934	1.89193	21.1004	0.57017	1066.89	79.0605	0.795941	0.0106834	0.515093	0.0057615	0.554004	0.131612
20798	ArPeISLb48kH*p		North Sea	UK	58॰ 37’ N	1॰ 27’ E	modern	ISL	48	140	48	THAA	3	549.664	168.198	505.106	152.081	72.4258	3.99609	123.09	15.3884	50.5623	10.5705	974.039	74.6667	251.233	32.0342	827.856	98.0119	262.399	58.7091	545.153	78.737	23.3554	5.94637	174.853	22.7741	136.934	15.3433	56.5145	5.34854	4553.19	554.448	0.867273	0.0126886	0.51166	0.00922964	0.907996	0.133735
[truncated: 46 more columns]

## Sheet: Framework+ontogeny
Amino acid concentration, percentage composition, extent of amino acid racemization (D/L) for free amino acid (FAA) and total hydrolisable amino acid (THAA) fraction for A. islandica from the North Sea used in bleaching experiments
(samples with the same Lab ID are analytical replicates)
All concentrations are reported in pmol/mg.
Lot number	Sample name	Lab ID	Area	Country	Latitude	Longitude	Age	Dating method	Layer	Bleach time / h	Ontogeny	FAA or THAA ?	Asx D/L	Glx D/L	Ser D/L	Val D/L
	ArBriOSL1b48F	15035bF	Bridlington beach	UK	54॰ 4’ N	0॰ 11’ W	Modern ?		iOSL	48		FAA	0.172675	0	0.352567	#DIV/0!
	ArBriOSL2b48F	15036bF	Bridlington beach	UK	54॰ 4’ N	0॰ 11’ W	Modern ?		iOSL	48		FAA	0.166877	0	0.294934	0
20798	ArPeL1iOSL1b48	14827bF	North Sea		58॰ 37’ N	1॰ 27’ E	Modern		iOSL	48		FAA	0.168142	0	0.484933	#DIV/0!
20798	ArPeL1iOSL2b48	14828bF	North Sea		58॰ 37’ N	1॰ 27’ E	Modern		iOSL	48		FAA	0	0	0.381551	#DIV/0!
20798	ArPeL1iOSL3b48	14829bF	North Sea		58॰ 37’ N	1॰ 27’ E	Modern		iOSL	48		FAA	0	#DIV/0!	0.401639	#DIV/0!
	ArNsM1A1bF	15278bF	North Sea	UK	58॰ 37’ N	1॰ 27’ E	Modern		iOSL	48	early	FAA	0.186331	0	0.460249	#DIV/0!
	ArNsM1A1bF	15278bF	North Sea	UK	58॰ 37’ N	1॰ 27’ E	Modern		iOSL	48	early	FAA	0.176284	0	0.299536	#DIV/0!
	ArNsM1A2bF	15279bF	North Sea	UK	58॰ 37’ N	1॰ 27’ E	Modern		iOSL	48	late	FAA	0	0	0.314416	#DIV/0!
	ArNsM1A2bF	15279bF	North Sea	UK	58॰ 37’ N	1॰ 27’ E	Modern		iOSL	48	late	FAA	0.135103	0	0.24399	0
	ArNsM2C1bF	15280bF	North Sea	UK	58॰ 37’ N	1॰ 27’ E	Modern		iOSL	48	early	FAA	0	0	0.419826	#DIV/0!
	ArNsM2C1bF	15280bF	North Sea	UK	58॰ 37’ N	1॰ 27’ E	Modern		iOSL	48	early	FAA	0.207888	0	0.300028	#DIV/0!
	ArNsM2C2bF	15281bF	North Sea	UK	58॰ 37’ N	1॰ 27’ E	Modern		iOSL	48	late	FAA	0	0	0.440797	#DIV/0!
	ArNsM2C2bF	15281bF	North Sea	UK	58॰ 37’ N	1॰ 27’ E	Modern		iOSL	48	late	FAA	0.153849	0	0.335938	#DIV/0!
	ArNsM3A1bF	15282bF	North Sea	UK	58॰ 37’ N	1॰ 27’ E	Modern		iOSL	48	early	FAA	0.291487	0	0.348942	#DIV/0!
	ArNsM3A1bF	15282bF	North Sea	UK	58॰ 37’ N	1॰ 27’ E	Modern		iOSL	48	early	FAA	0.270816	0	0.280141	#DIV/0!
	ArNsM3A2bF	15283bF	North Sea	UK	58॰ 37’ N	1॰ 27’ E	Modern		iOSL	48	late	FAA	0.166345	0.348441	0.459632	#DIV/0!
	ArNsM3A2bF	15283bF	North Sea	UK	58॰ 37’ N	1॰ 27’ E	Modern		iOSL	48	late	FAA	0.169926	0.233817	0.261724	0
	ArIcP1A1bF	15274bF	North Icelandic Shelf	Iceland	66° 31.59’ N	18° 11.74’ W	Post-medieval		iOSL	48	early	FAA	0.223548	0	0.435886	#DIV/0!
	ArIcP1A1bF	15274bF	North Icelandic Shelf	Iceland	66° 31.59’ N	18° 11.74’ W	Post-medieval		iOSL	48	early	FAA	0.224808	0	0.379777	#DIV/0!
	ArIcP1A2bF	15275bF	North Icelandic Shelf	Iceland	66° 31.59’ N	18° 11.74’ W	Post-medieval		iOSL	48	late	FAA	0.256553	0.316139	0.448458	#DIV/0!
	ArIcP1A2bF	15275bF	North Icelandic Shelf	Iceland	66° 31.59’ N	18° 11.74’ W	Post-medieval		iOSL	48	late	FAA	0.269871	0.454161	0.367595	#DIV/0!
	ArIcP2B1bF	15276bF	North Icelandic Shelf	Iceland	66° 31.59’ N	18° 11.74’ W	Post-medieval		iOSL	48	early	FAA	0.270252	0.740842	0.442899	#DIV/0!
	ArIcP2B1bF	15276bF	North Icelandic Shelf	Iceland	66° 31.59’ N	18° 11.74’ W	Post-medieval		iOSL	48	early	FAA	0.239437	0	0.334312	#DIV/0!
	ArIcP2B2bF	15277bF	North Icelandic Shelf	Iceland	66° 31.59’ N	18° 11.74’ W	Post-medieval		iOSL	48	late	FAA	0.134652	0.426941	0.379248	#DIV/0!
	ArIcP2B2bF	15277bF	North Icelandic Shelf	Iceland	66° 31.59’ N	18° 11.74’ W	Post-medieval		iOSL	48	late	FAA	0.133234	0.466315	0.316275	#DIV/0!
	ArNIS061746bF	16215bF	North Icelandic Shelf	Iceland	66° 31.59’ N	18° 11.74’ W	Late Holocene		iOSL	48		FAA	0.314722	0	0.456247	#DIV/0!
	ArNIS061305bF	16216bF	North Icelandic Shelf	Iceland	66° 31.59’ N	18° 11.74’ W	Late Holocene		iOSL	48		FAA	0.386227	0	0.511496	0
	ArNIS061617bF	16217bF	North Icelandic Shelf	Iceland	66° 31.59’ N	18° 11.74’ W	Late Holocene		iOSL	48		FAA	0.33122	0	0.561499	0
	ArNIS061407bF	16218bF	North Icelandic Shelf	Iceland	66° 31.59’ N	18° 11.74’ W	Late Holocene		iOSL	48		FAA	0.261212	0	0.503603	0
	ArNIS061711bF	16219bF	North Icelandic Shelf	Iceland	66° 31.59’ N	18° 11.74’ W	Late Holocene		iOSL	48		FAA	0.253384	0	0.414158	0
	ArNsP1A1bF	15268bF	Fladen Ground	UK	58.831° N	−0.356° E	Mid-Holocene		iOSL	48	early	FAA	0.506213	0.143586	0.793262	0.17422
	ArNsP1A1bF	15268bF	Fladen Ground	UK	58.831° N	−0.356° E	Mid-Holocene		iOSL	48	early	FAA	0.495584	0.218433	0.797588	0.23336
	ArNsP1A2bF	15269bF	Fladen Ground	UK	58.831° N	−0.356° E	Mid-Holocene		iOSL	48	late	FAA	0.507298	0.162396	0.908366	0.159748
	ArNsP1A2bF	15269bF	Fladen Ground	UK	58.831° N	−0.356° E	Mid-Holocene		iOSL	48	late	FAA	0.512119	0.214215	0.87632	0.182449
	ArNsP2A1bF	15270bF	Fladen Ground	UK	58.831° N	−0.356° E	Mid-Holocene		iOSL	48	early	FAA	0.489766	0.152578	0.844458	0.308431
	ArNsP2A1bF	15270bF	Fladen Ground	UK	58.831° N	−0.356° E	Mid-Holocene		iOSL	48	early	FAA	0.49128	0.15425	0.805848	0.132975
	ArNsP2A2bF	15271bF	Fladen Ground	UK	58.831° N	−0.356° E	Mid-Holocene		iOSL	48	late	FAA	0.504581	0.160378	0.884597	0.16629
	ArNsP2A2bF	15271bF	Fladen Ground	UK	58.831° N	−0.356° E	Mid-Holocene		iOSL	48	late	FAA	0.512322	0.210861	0.827536	0.218959
	ArNsP3A1bF	15272bF	Fladen Ground	UK	58.831° N	−0.356° E	Mid-Holocene		iOSL	48	early	FAA	0.495084	0.120773	0.858051	0.121473
	ArNsP3A1bF	15272bF	Fladen Ground	UK	58.831° N	−0.356° E	Mid-Holocene		iOSL	48	early	FAA	0.513622	0.134974	0.814698	0.105563
	ArNsP3A2bF	15273bF	Fladen Ground	UK	58.831° N	−0.356° E	Mid-Holocene		iOSL	48	late	FAA	0.495801	0.165199	0.869726	0.147204
	ArNsP3A2bF	15273bF	Fladen Ground	UK	58.831° N	−0.356° E	Mid-Holocene		iOSL	48	late	FAA	0.508868	0.172452	0.795818	0.167383
	ArNs0658bF	15641bF	Fladen Ground	UK	58° 50’ N	0° 21.35’ W	Mid-Holocene		iOSL	48		FAA	0.5063	0.154054	0.864885	0.156454
	ArNs0658bF	15641bF	Fladen Ground	UK	58° 50’ N	0° 21.35’ W	Mid-Holocene		iOSL	48		FAA	0.505781	0.163101	0.879692	0.130198
	ArNs0684bF	15643bF	Fladen Ground	UK	58.831° N	−0.356° E	Mid-Holocene		iOSL	48		FAA	0.500354	0.15028	0.860444	0.147732
	ArNs0684bF	15643bF	Fladen Ground	UK	58.831° N	−0.356° E	Mid-Holocene		iOSL	48		FAA	0.492358	0.147498	0.87546	0.148763
	ArWeyiOSL1b48F	15052bF	Weybourne Crag	UK	52° 56.55’ N	1° 08.33’ E	Early Pleistocene		iOSL	48		FAA	0.855759	0.637222	1.35568	0.730054
	ArWeyiOSL2b48F	15081bF	Weybourne Crag	UK	52° 56.55’ N	1° 08.33’ E	Early Pleistocene		iOSL	48		FAA	0.844801	0.615788	1.00624	0.755107
	ArPeL1iOSL1b48	14827bH*	North Sea	UK	58॰ 37’ N	1॰ 27’ E	modern		iOSL	48		THAA	0.133768	0.0683684	0.154919	0.216651
	ArPeL1iOSL2b48	14828bH*	North Sea	UK	58॰ 37’ N	1॰ 27’ E	modern		iOSL	48		THAA	0.145062	0.0754374	0.254822	0.198241
	ArPeL1iOSL3b48	14829bH*	North Sea	UK	58॰ 37’ N	1॰ 27’ E	modern		iOSL	48		THAA	0.140284	0.067574	0.262988	0.170623
	ArBriOSL1b48H*	15035bH*	North Sea	UK	58॰ 37’ N	1॰ 27’ E	modern		iOSL	48		THAA	0.159578	0.0735095	0.275434	0
	ArBriOSL2b48H*	15036bH*	North Sea	UK	58॰ 37’ N	1॰ 27’ E	modern		iOSL	48		THAA	0.159884	0.0722123	0.279832	0
	ArNsM1A1bH*	15278bH*	North Sea	UK	58॰ 37’ N	1॰ 27’ E	modern		iOSL	48	early	THAA	0.136981	0.060573	0.275639	0.154387
	ArNsM1A1bH*	15278bH*	North Sea	UK	58॰ 37’ N	1॰ 27’ E	modern		iOSL	48	early	THAA	0.135285	0.0687311	0.262437	0.118175
	ArNsM1A2bH*	15279bH*	North Sea	UK	58॰ 37’ N	1॰ 27’ E	modern		iOSL	48	late	THAA	0.112115	0.0544678	0.222306	0.106898
	ArNsM1A2bH*	15279bH*	North Sea	UK	58॰ 37’ N	1॰ 27’ E	modern		iOSL	48	late	THAA	0.109941	0.0557759	0.217359	0.110024
	ArNsM2C1bH*	15280bH*	North Sea	UK	58॰ 37’ N	1॰ 27’ E	modern		iOSL	48	early	THAA	0.132321	0.0631885	0.272135	0.137351
	ArNsM2C1bH*	15280bH*	North Sea	UK	58॰ 37’ N	1॰ 27’ E	modern		iOSL	48	early	THAA	0.134735	0.0680749	0.260439	0
	ArNsM2C2bH*	15281bH*	North Sea	UK	58॰ 37’ N	1॰ 27’ E	modern		iOSL	48	late	THAA	0.13374	0.0713385	0.24499	0.102373
	ArNsM2C2bH*	15281bH*	North Sea	UK	58॰ 37’ N	1॰ 27’ E	modern		iOSL	48	late	THAA	0.134492	0.0724332	0.246573	0.0915525
	ArNsM3A1bH*	15282bH*	North Sea	UK	58॰ 37’ N	1॰ 27’ E	modern		iOSL	48	early	THAA	0.127747	0.0605397	0.253742	0.0935079
	ArNsM3A1bH*	15282bH*	North Sea	UK	58॰ 37’ N	1॰ 27’ E	modern		iOSL	48	early	THAA	0.129162	0.0628876	0.255381	0.113722
	ArNsM3A2bH*	15283bH*	North Sea	UK	58॰ 37’ N	1॰ 27’ E	modern		iOSL	48	late	THAA	0.153612	0.0911755	0.254536	0.169491
	ArNsM3A2bH*	15283bH*	North Sea	UK	58॰ 37’ N	1॰ 27’ E	modern		iOSL	48	late	THAA	0.156892	0.094781	0.254902	0.145448
	ArIcP1A1bH*	15274bH*	North Icelandic Shelf	Iceland	66° 31.59’ N	18° 11.74’ W	Post-medieval		iOSL	48	early	THAA	0.163318	0.0768801	0.32207	0.108251
	ArIcP1A1bH*	15274bH*	North Icelandic Shelf	Iceland	66° 31.59’ N	18° 11.74’ W	Post-medieval		iOSL	48	early	THAA	0.165223	0.0807299	0.316314	0.137266
	ArIcP1A2bH*	15275bH*	North Icelandic Shelf	Iceland	66° 31.59’ N	18° 11.74’ W	Post-medieval		iOSL	48	late	THAA	0.191458	0.126801	0.321024	0.127528
	ArIcP1A2bH*	15275bH*	North Icelandic Shelf	Iceland	66° 31.59’ N	18° 11.74’ W	Post-medieval		iOSL	48	late	THAA	0.200898	0.129055	0.315875	0.146413
	ArIcP2B1bH*	15276bH*	North Icelandic Shelf	Iceland	66° 31.59’ N	18° 11.74’ W	Post-medieval		iOSL	48	early	THAA	0.144278	0.0737139	0.277813	0.106446
	ArIcP2B1bH*	15276bH*	North Icelandic Shelf	Iceland	66° 31.59’ N	18° 11.74’ W	Post-medieval		iOSL	48	early	THAA	0.150621	0.0744184	0.271244	0.133009
	ArIcP2B2bH*	15277bH*	North Icelandic Shelf	Iceland	66° 31.59’ N	18° 11.74’ W	Post-medieval		iOSL	48	late	THAA	0.148709	0.075067	0.28745	0.0910444
	ArIcP2B2bH*	15277bH*	North Icelandic Shelf	Iceland	66° 31.59’ N	18° 11.74’ W	Post-medieval		iOSL	48	late	THAA	0.1539	0.075558	0.288518	0.0407531
	ArNIS061746bH*	16215bH*	North Icelandic Shelf	Iceland	66° 31.59’ N	18° 11.74’ W	Late Holocene		iOSL	48		THAA	0.172758	0.0394655	0.280657	0
	ArNIS061305bH*	16216bH*	North Icelandic Shelf	Iceland	66° 31.59’ N	18° 11.74’ W	Late Holocene		iOSL	48		THAA	0.221833	0.0499055	0.401432	0
	ArNIS061617bH*	16217bH*	North Icelandic Shelf	Iceland	66° 31.59’ N	18° 11.74’ W	Late Holocene		iOSL	48		THAA	0.186089	0.052184	0.390295	0.0965425
	ArNIS061407bH*	16218bH*	North Icelandic Shelf	Iceland	66° 31.59’ N	18° 11.74’ W	Late Holocene		iOSL	48		THAA	0.196293	0.0450868	0.377454	0
	ArNIS061711bH*	16219bH*	North Icelandic Shelf	Iceland	66° 31.59’ N	18° 11.74’ W	Late Holocene		iOSL	48		THAA	0.184651	0.0511992	0.336999	0
	ArNsP1A1bH*	15268bH*	Fladen Ground	UK	58.831° N	−0.356° E	Mid-Holocene		iOSL	48	early	THAA	0.30338	0.094178	0.46929	0.11871
	ArNsP1A1bH*	15268bH*	Fladen Ground	UK	58.831° N	−0.356° E	Mid-Holocene		iOSL	48	early	THAA	0.306356	0.0928035	0.432171	0.0761894
	ArNsP1A2bH*	15269bH*	Fladen Ground	UK	58.831° N	−0.356° E	Mid-Holocene		iOSL	48	late	THAA	0.317591	0.105111	0.4758	0.106294
	ArNsP1A2bH*	15269bH*	Fladen Ground	UK	58.831° N	−0.356° E	Mid-Holocene		iOSL	48	late	THAA	0.325534	0.107217	0.435013	0.0338313
	ArNsP2A1bH*	15270bH*	Fladen Ground	UK	58.831° N	−0.356° E	Mid-Holocene		iOSL	48	early	THAA	0.308322	0.0900606	0.478838	0.0979635
	ArNsP2A1bH*	15270bH*	Fladen Ground	UK	58.831° N	−0.356° E	Mid-Holocene		iOSL	48	early	THAA	0.310465	0.0902373	0.463645	0.0924965
	ArNsP2A2bH*	15271bH*	Fladen Ground	UK	58.831° N	−0.356° E	Mid-Holocene		iOSL	48	late	THAA	0.325552	0.115339	0.514807	0.128061
	ArNsP2A2bH*	15271bH*	Fladen Ground	UK	58.831° N	−0.356° E	Mid-Holocene		iOSL	48	late	THAA	0.32754	0.120083	0.478976	0.148566
	ArNsP3A1bH*	15272bH*	Fladen Ground	UK	58.831° N	−0.356° E	Mid-Holocene		iOSL	48	early	THAA	0.295184	0.0949304	0.452876	0.104654
	ArNsP3A1bH*	15272bH*	Fladen Ground	UK	58.831° N	−0.356° E	Mid-Holocene		iOSL	48	early	THAA	0.299474	0.0986308	0.438639	0.13283
	ArNsP3A2bH*	15273bH*	Fladen Ground	UK	58.831° N	−0.356° E	Mid-Holocene		iOSL	48	late	THAA	0.333533	0.117074	0.547746	0.137344
	ArNsP3A2bH*	15273bH*	Fladen Ground	UK	58.831° N	−0.356° E	Mid-Holocene		iOSL	48	late	THAA	0.335435	0.12288	0.499061	0.156688
	ArNs0658bH*	15641bH*	Fladen Ground	UK	58° 50’ N	0° 21.35’ W	Mid-Holocene		iOSL	48		THAA	0.315535	0.106508	0.444375	0.183102
	ArNs0658bH*	15641bH*	Fladen Ground	UK	58° 50’ N	0° 21.35’ W	Mid-Holocene		iOSL	48		THAA	0.315678	0.107113	0.435198	0.176066
	ArNs0684bH*	15643bH*	Fladen Ground	UK	58.831° N	−0.356° E	Mid-Holocene		iOSL	48		THAA	0.321056	0.104635	0.479242	0.193615
	ArNs0684bH*	15643bH*	Fladen Ground	UK	58.831° N	−0.356° E	Mid-Holocene		iOSL	48		THAA	0.321723	0.105024	0.481284	0.189276
	ArWeyiOSL1b48H*	15052bH*	Weybourne Crag	UK	52° 56.55’ N	1° 08.33’ E	Early Pleistocene		iOSL	48		THAA	0.692911	0.509514	0.18298	0.55166
	ArWeyiOSL2b48H*	15081bH*	Weybourne Crag	UK	52° 56.55’ N	1° 08.33’ E	Early Pleistocene		iOSL	48		THAA	0.690637	0.490835	0.136602	0.561241
